# Supplementary material for: Effect of a new formulation of micronized and ultramicronized N-palmitoylethanolamine in a tibia fracture mouse model of complex regional pain syndrome
Source: PubMed Central journal article supplement (PMC5464592; doi:10.1371/journal.pone.0178553), 2017-06-08

Fig. S1a

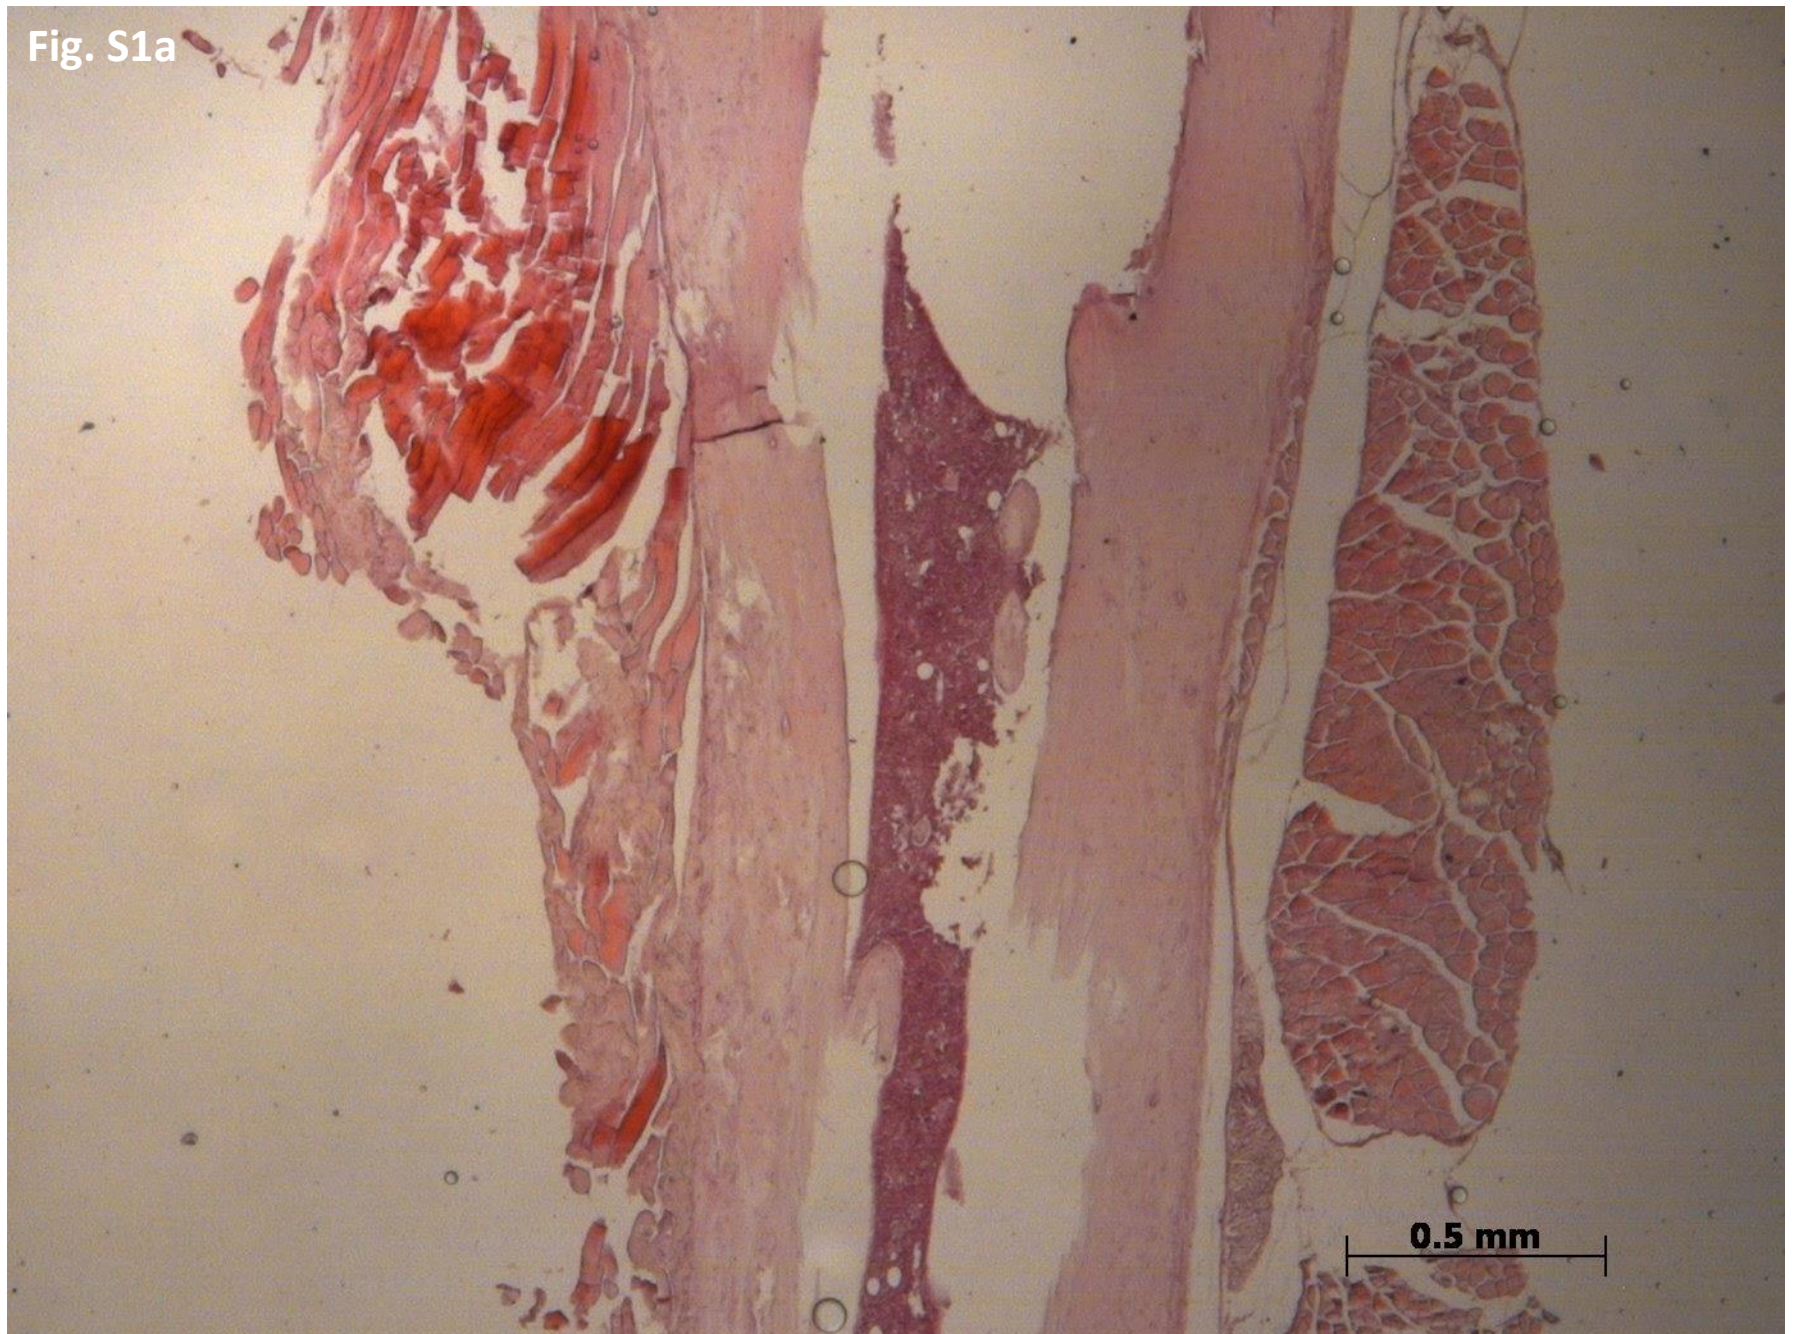



Fig. S1b

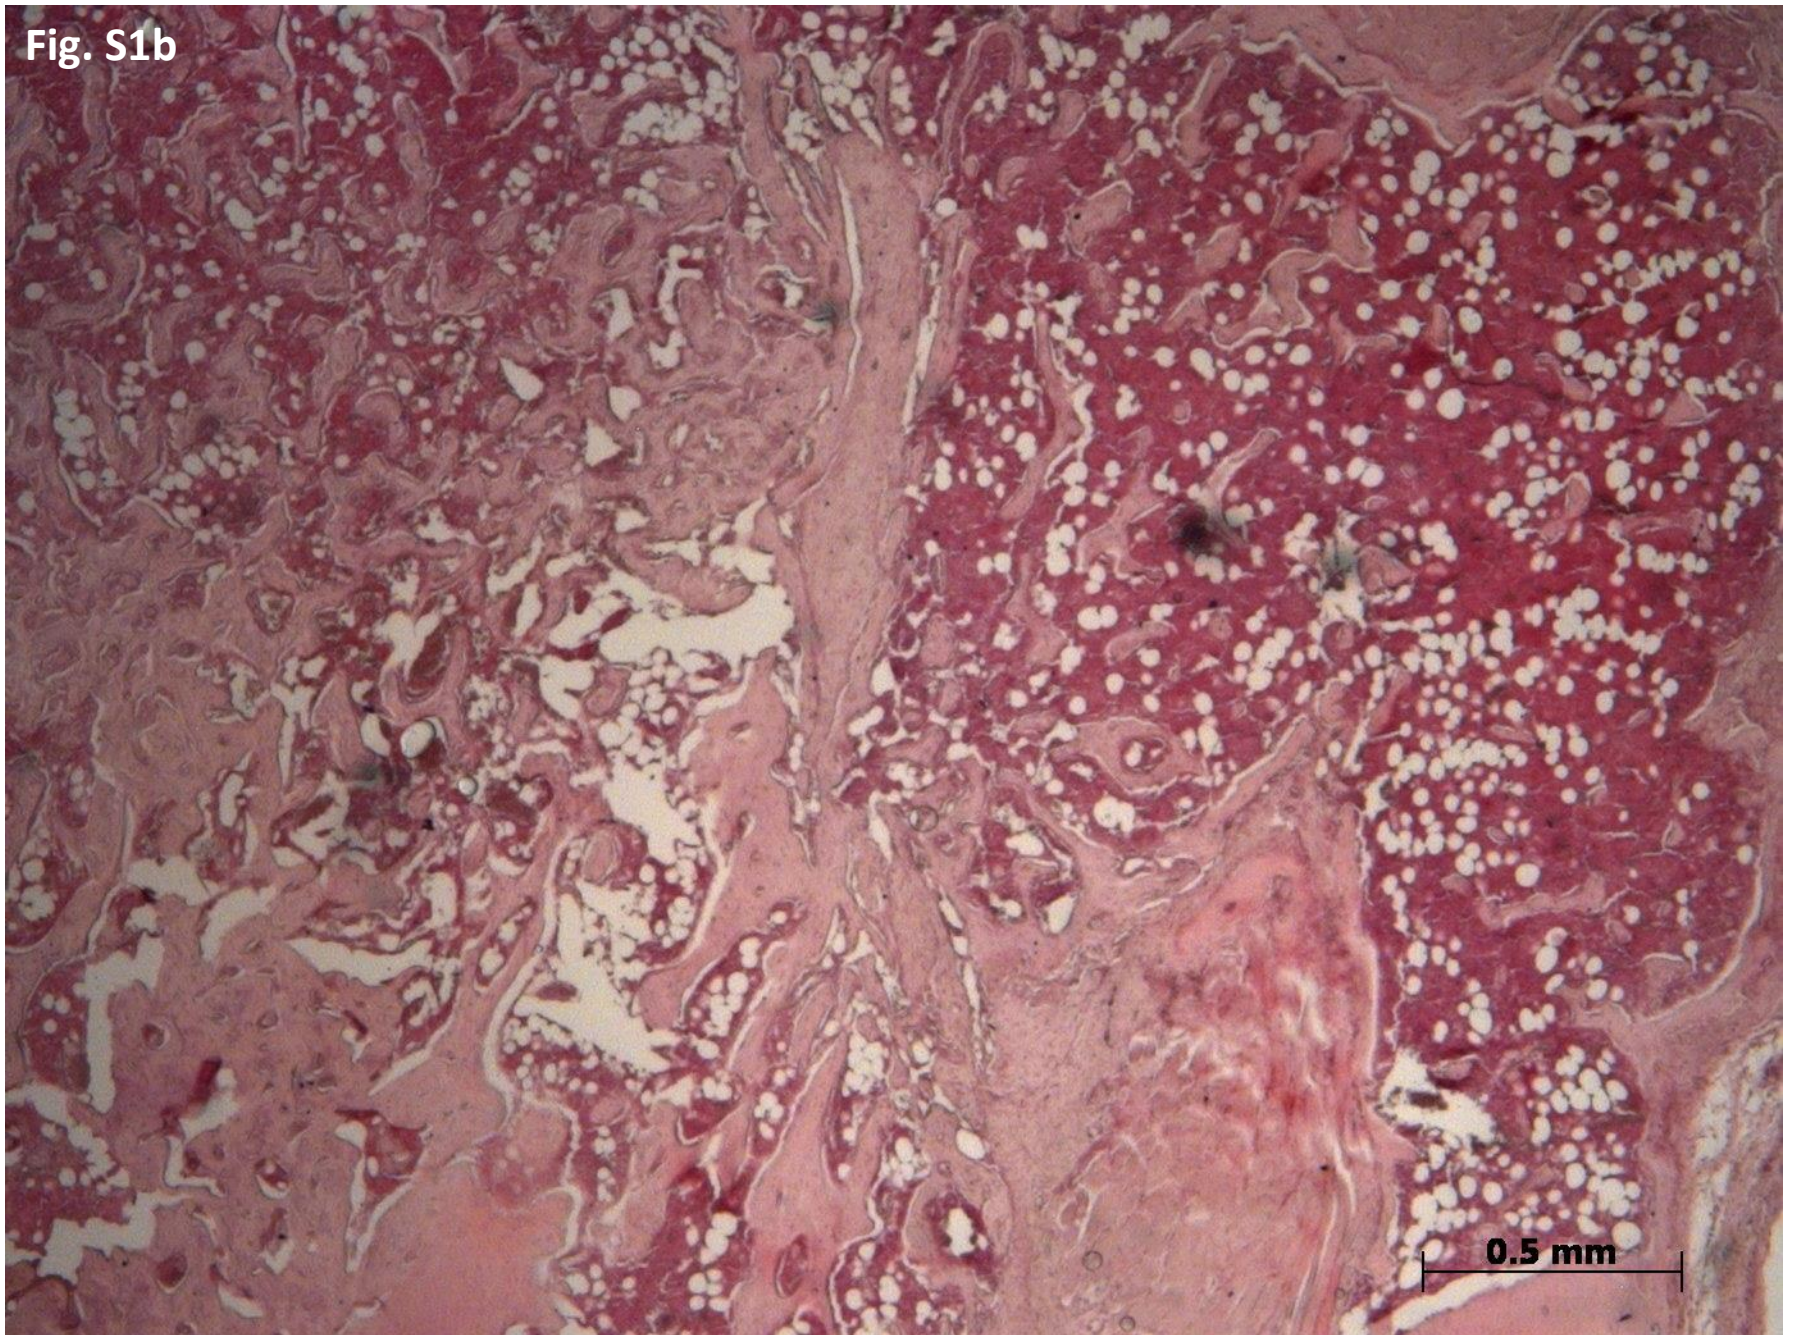



Fig. S1c

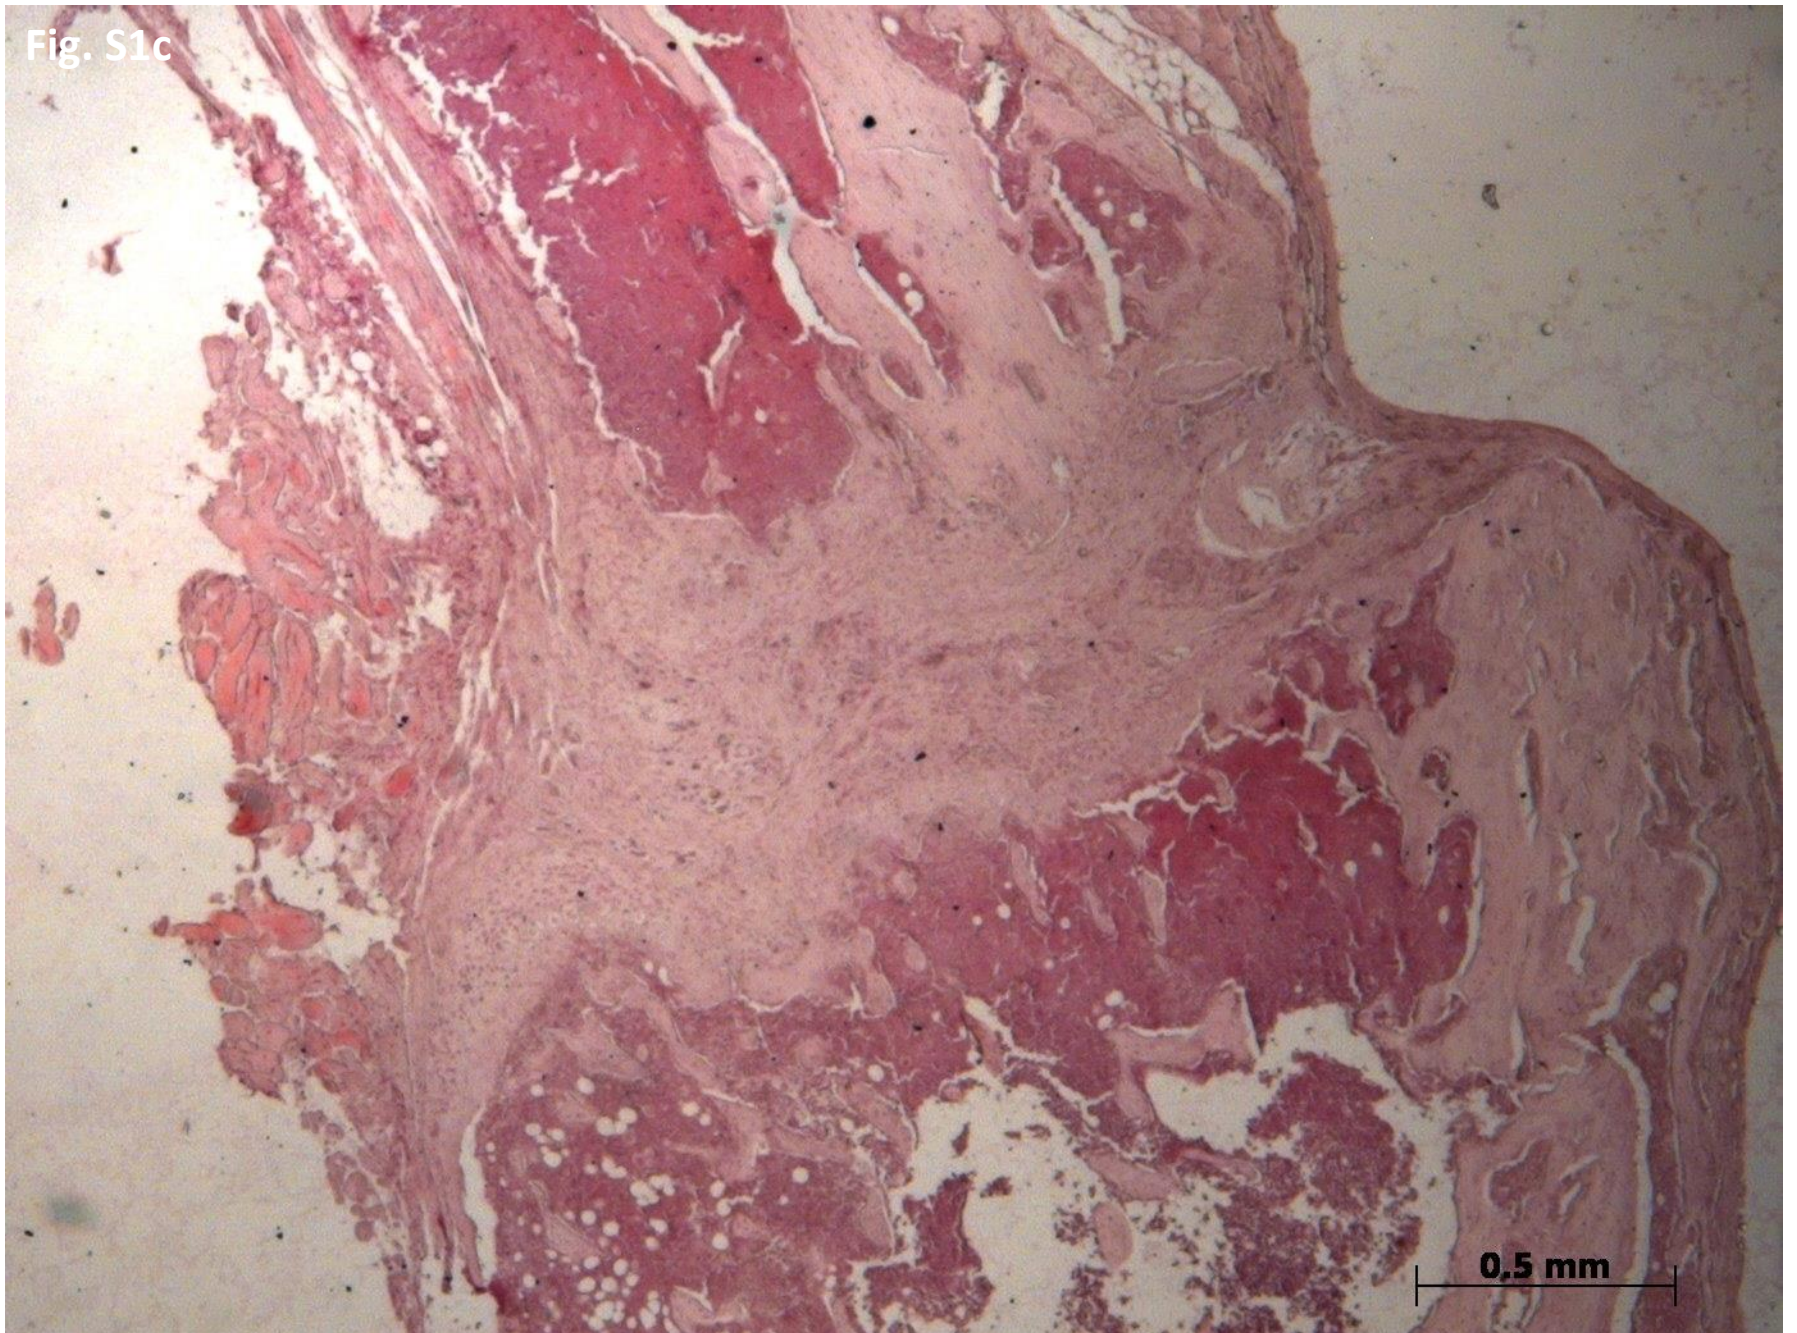

0,5 mm



Fig. S1d

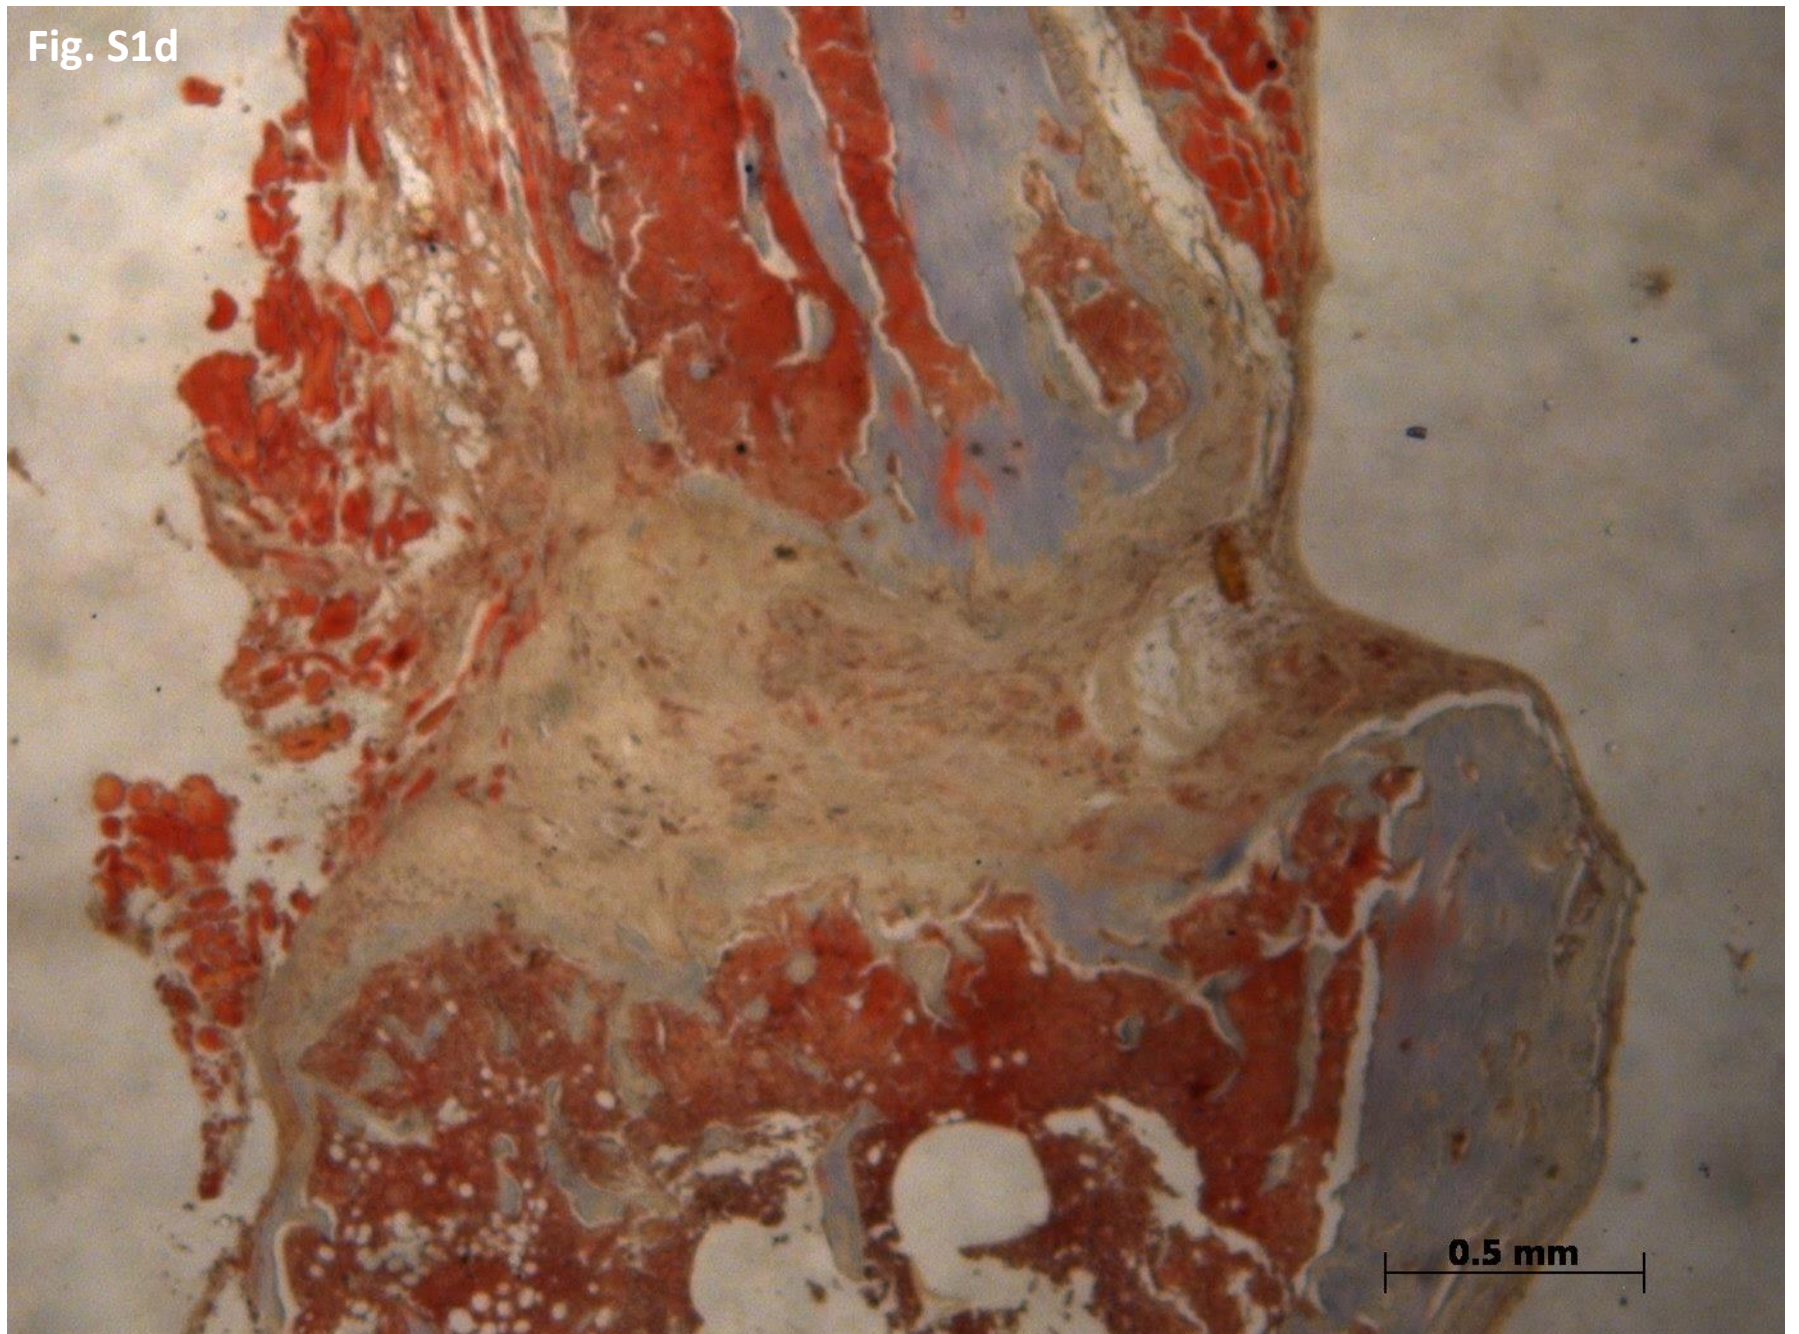



Fig. S1e

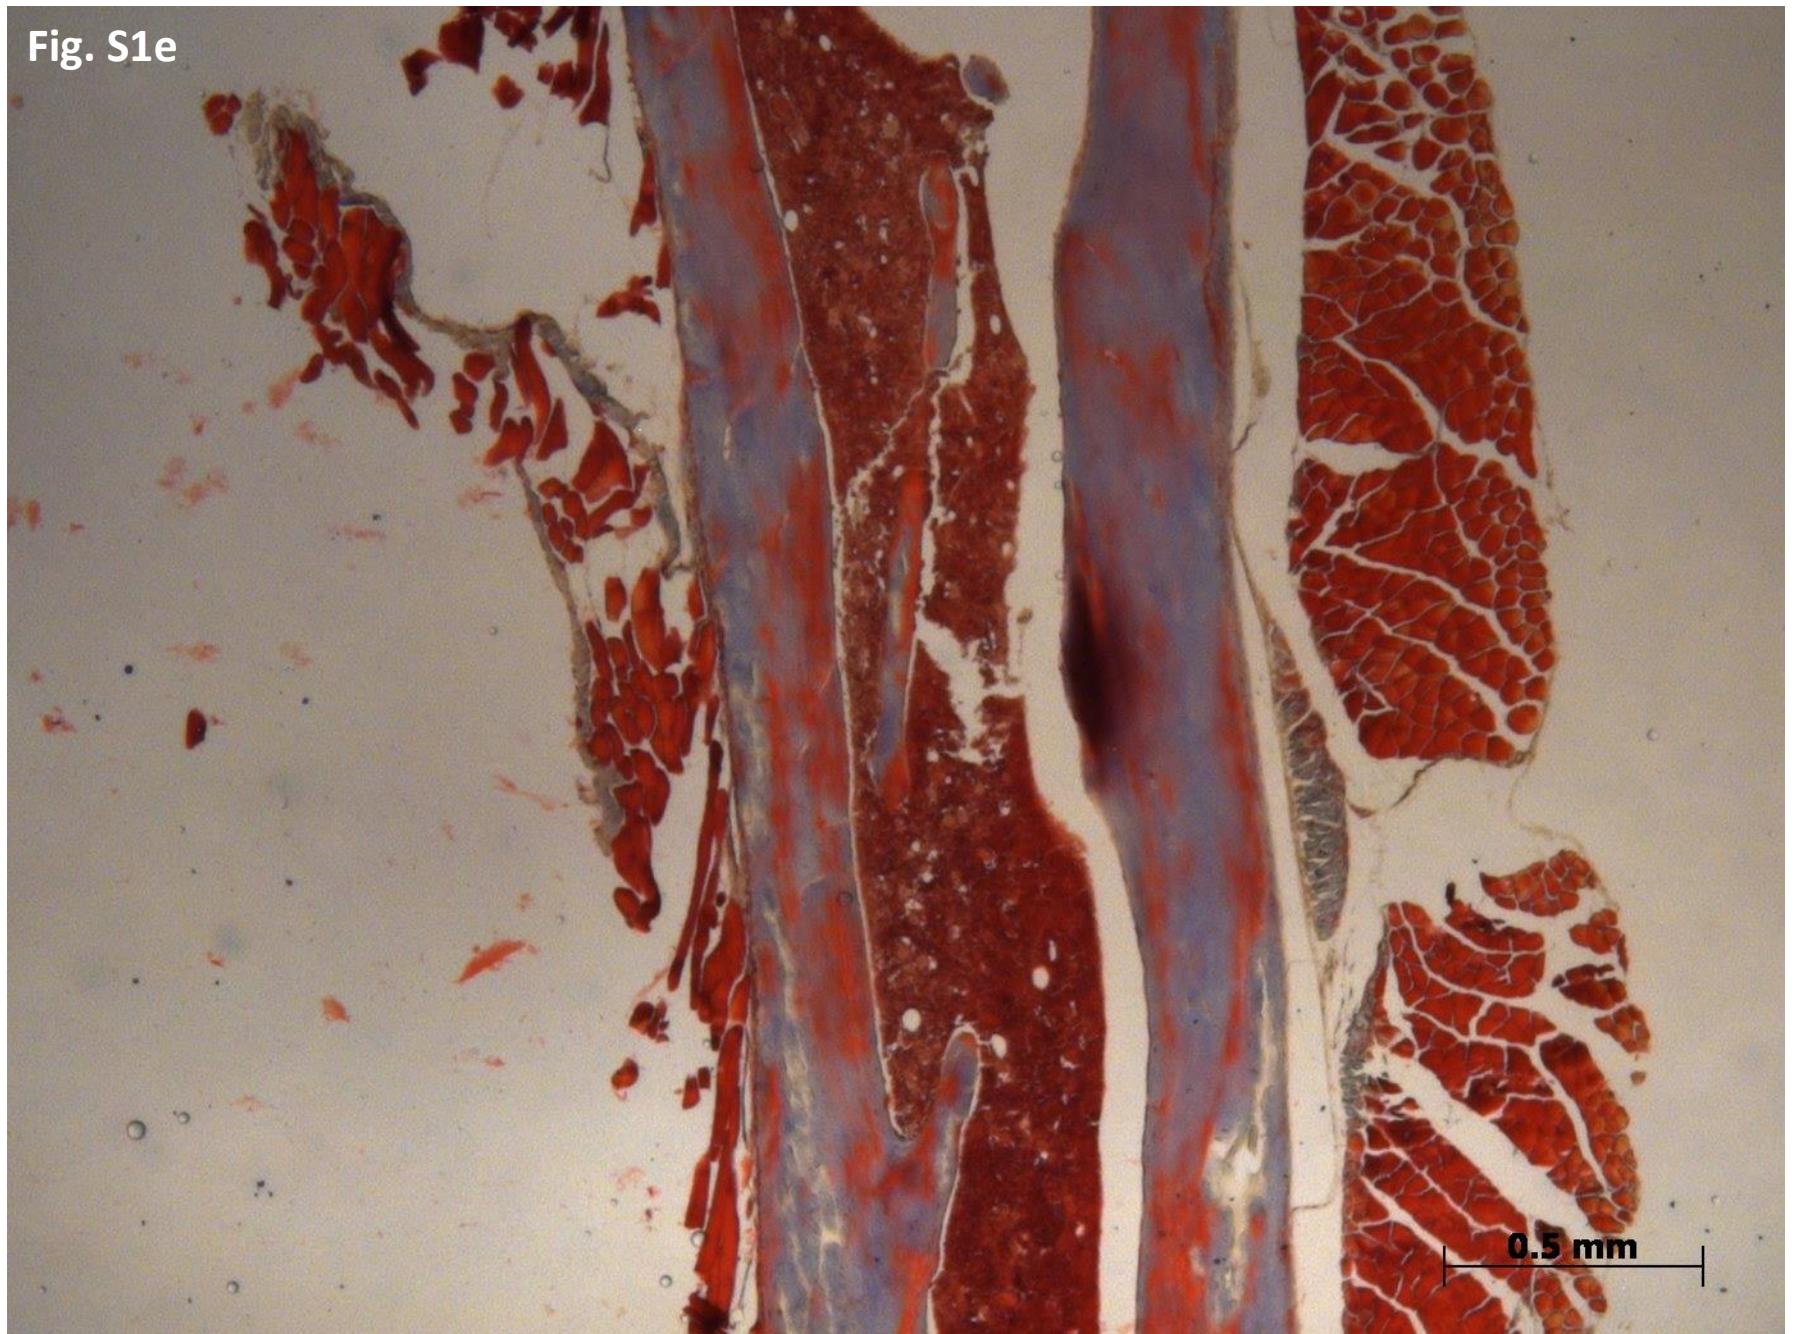



Fig. S1f

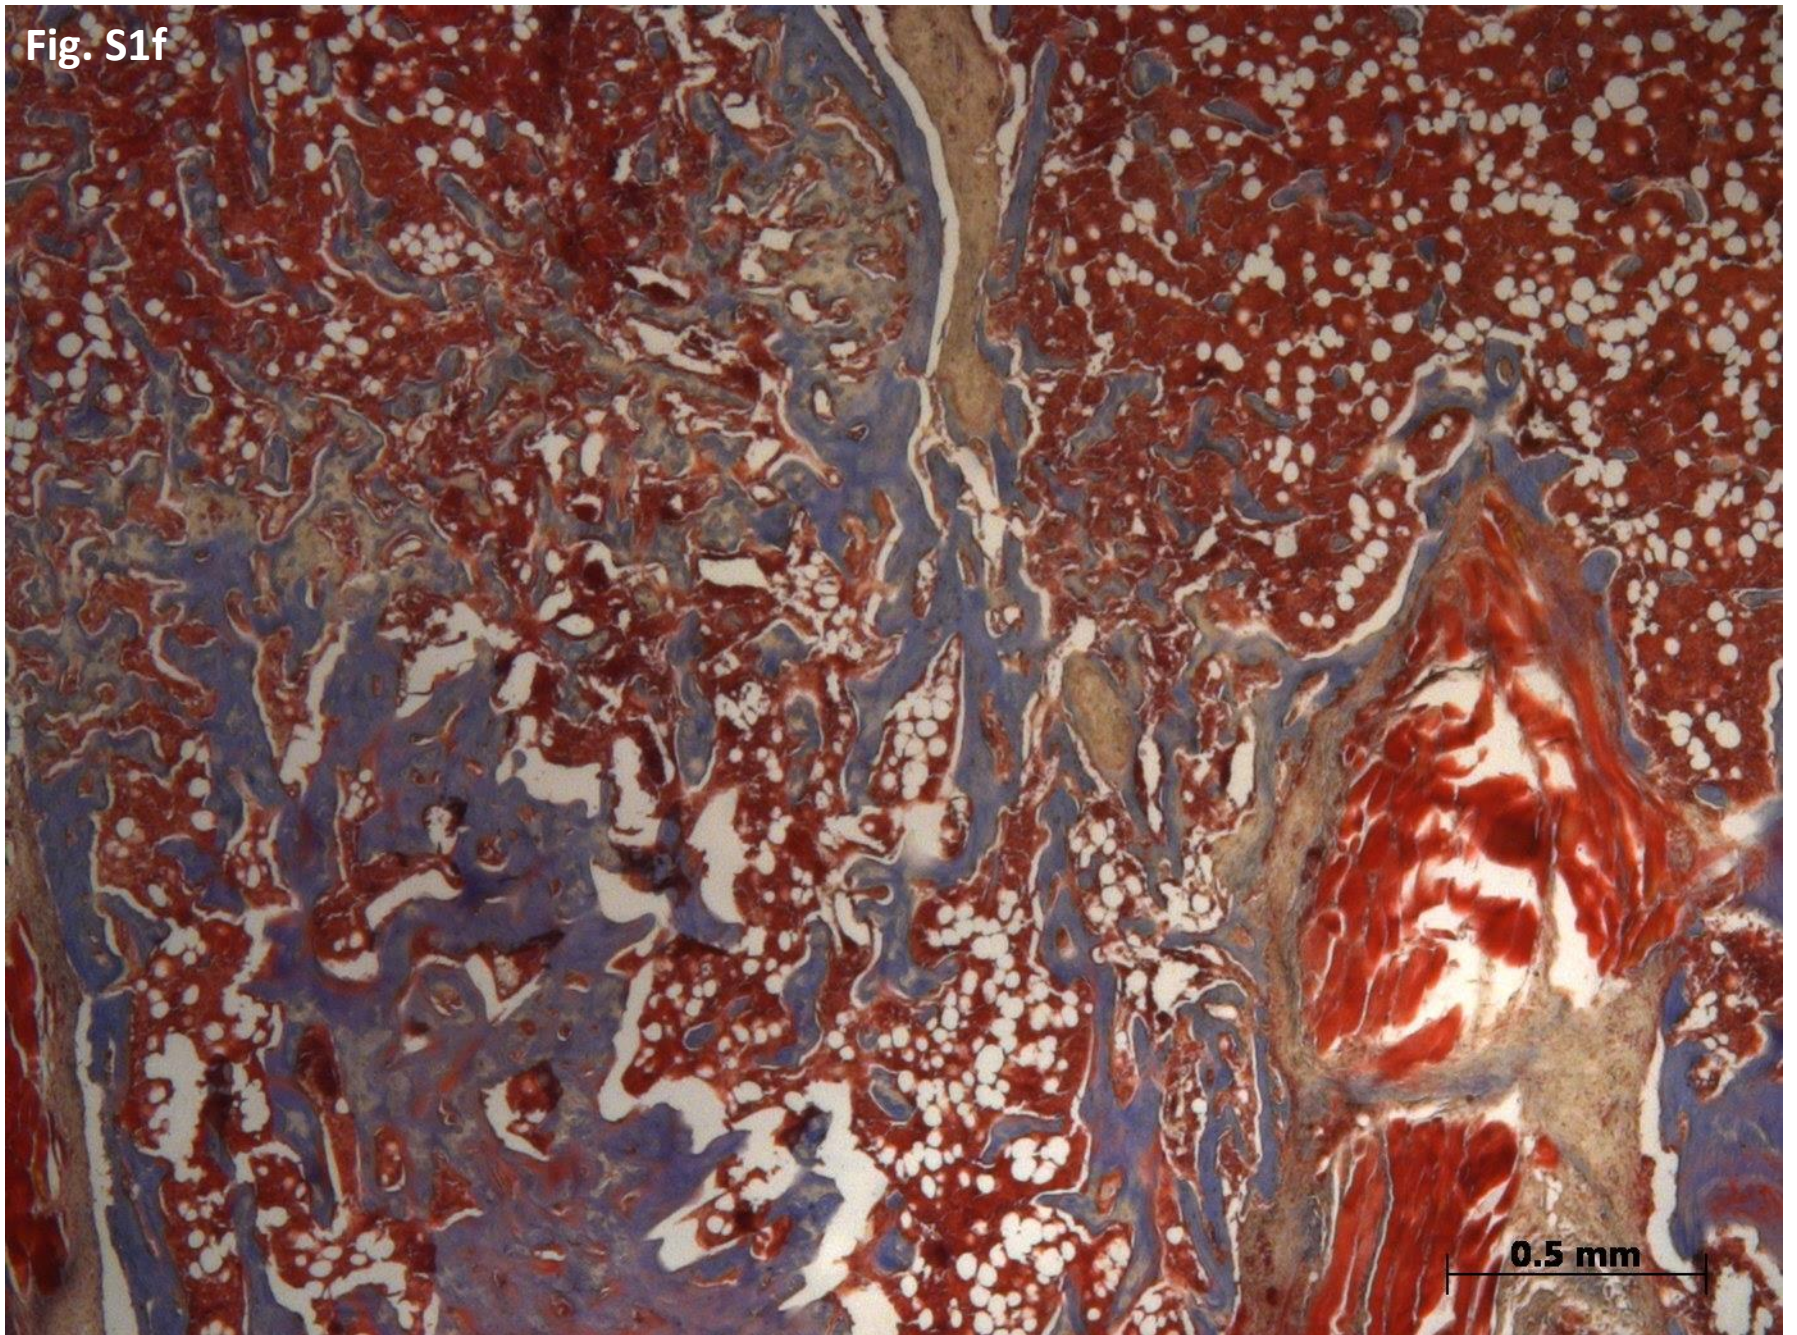

Supplement: pone.0178553.s001.pdf [file pone.0178553.s001.pdf]
