# Supplementary material for: Effect of a new formulation of micronized and ultramicronized N-palmitoylethanolamine in a tibia fracture mouse model of complex regional pain syndrome
Source: PubMed Central journal article supplement (PMC5464592; doi:10.1371/journal.pone.0178553), 2017-06-08

Fig. 2Sa

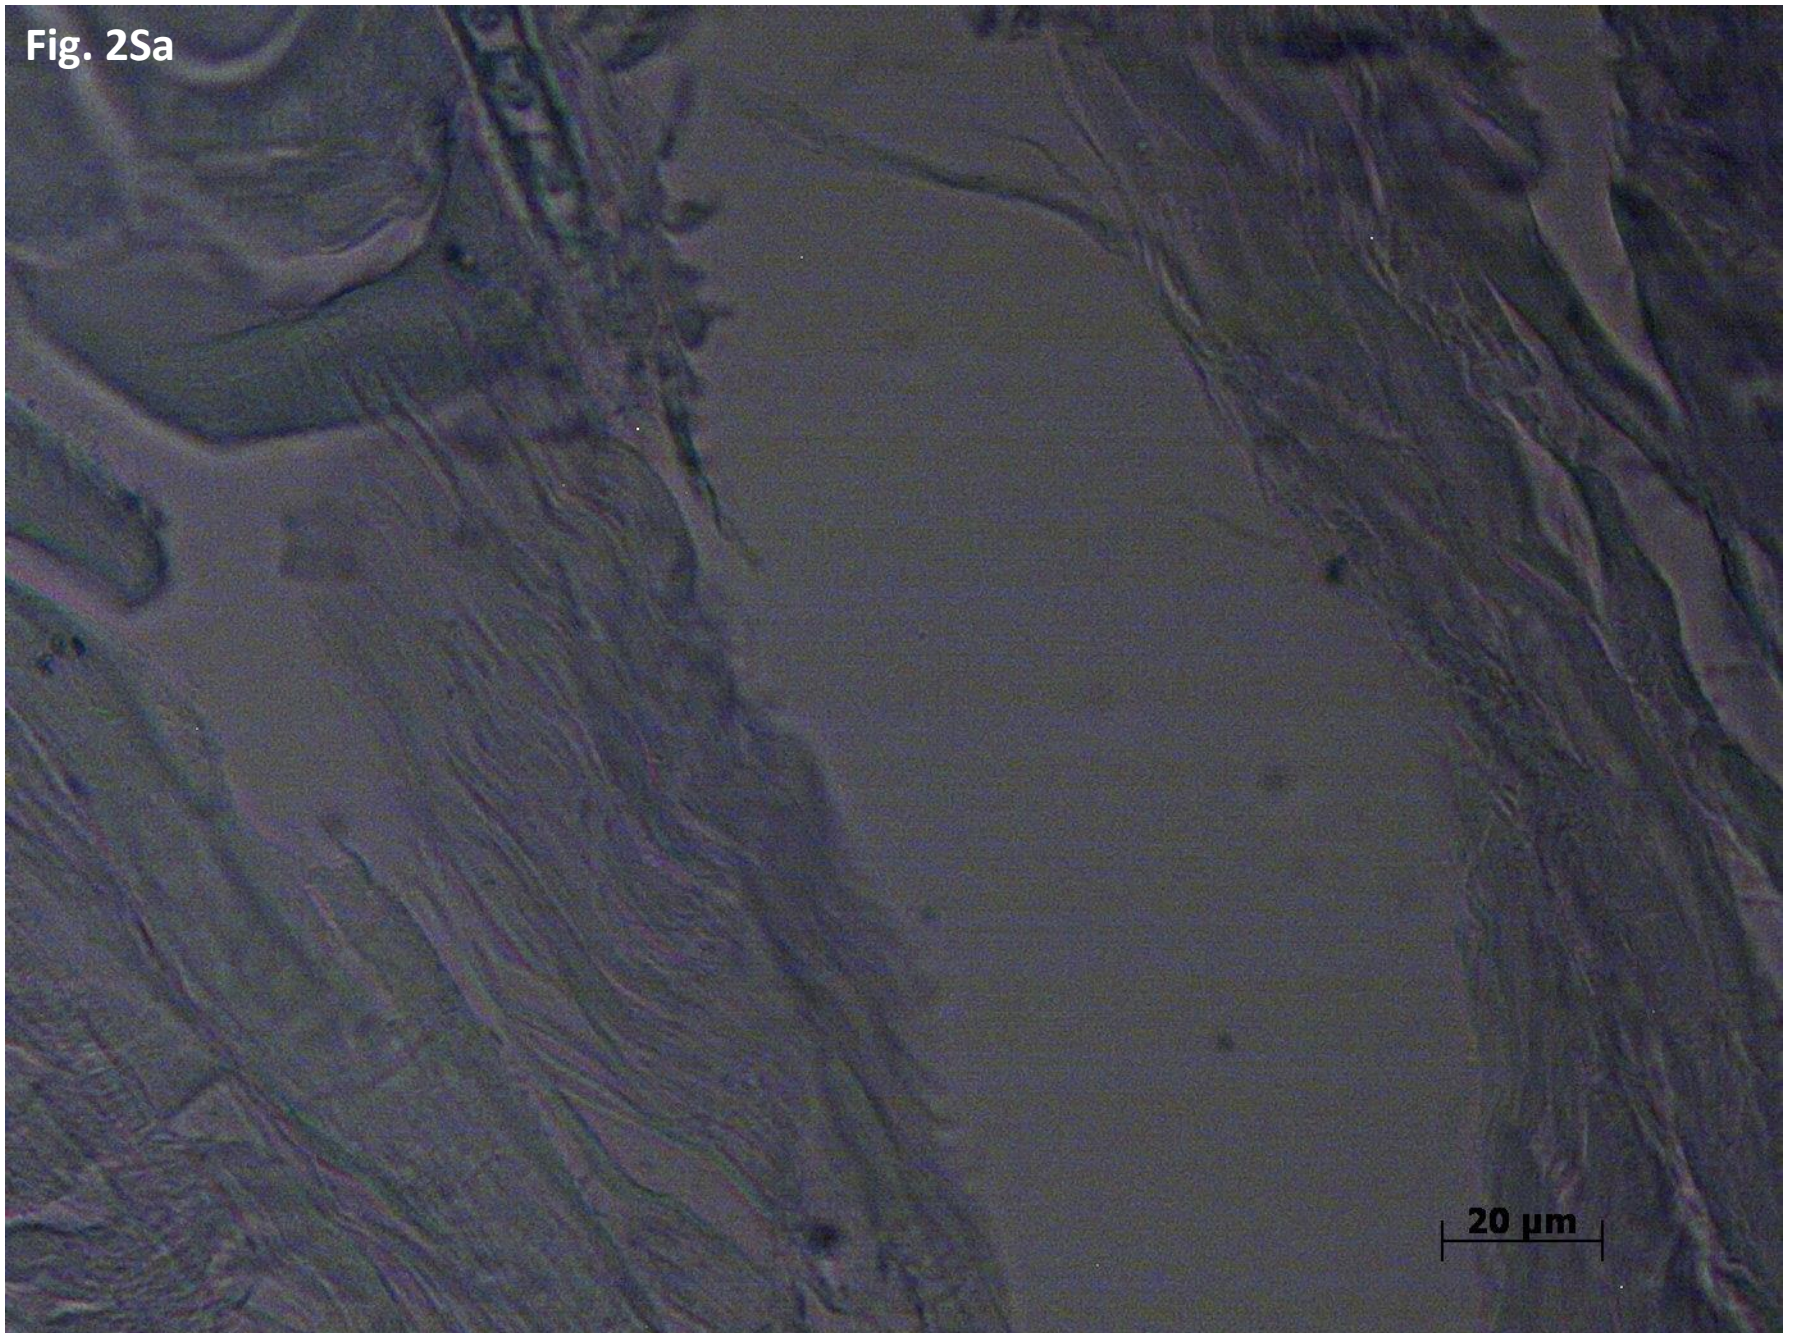



Fig. 2Sb

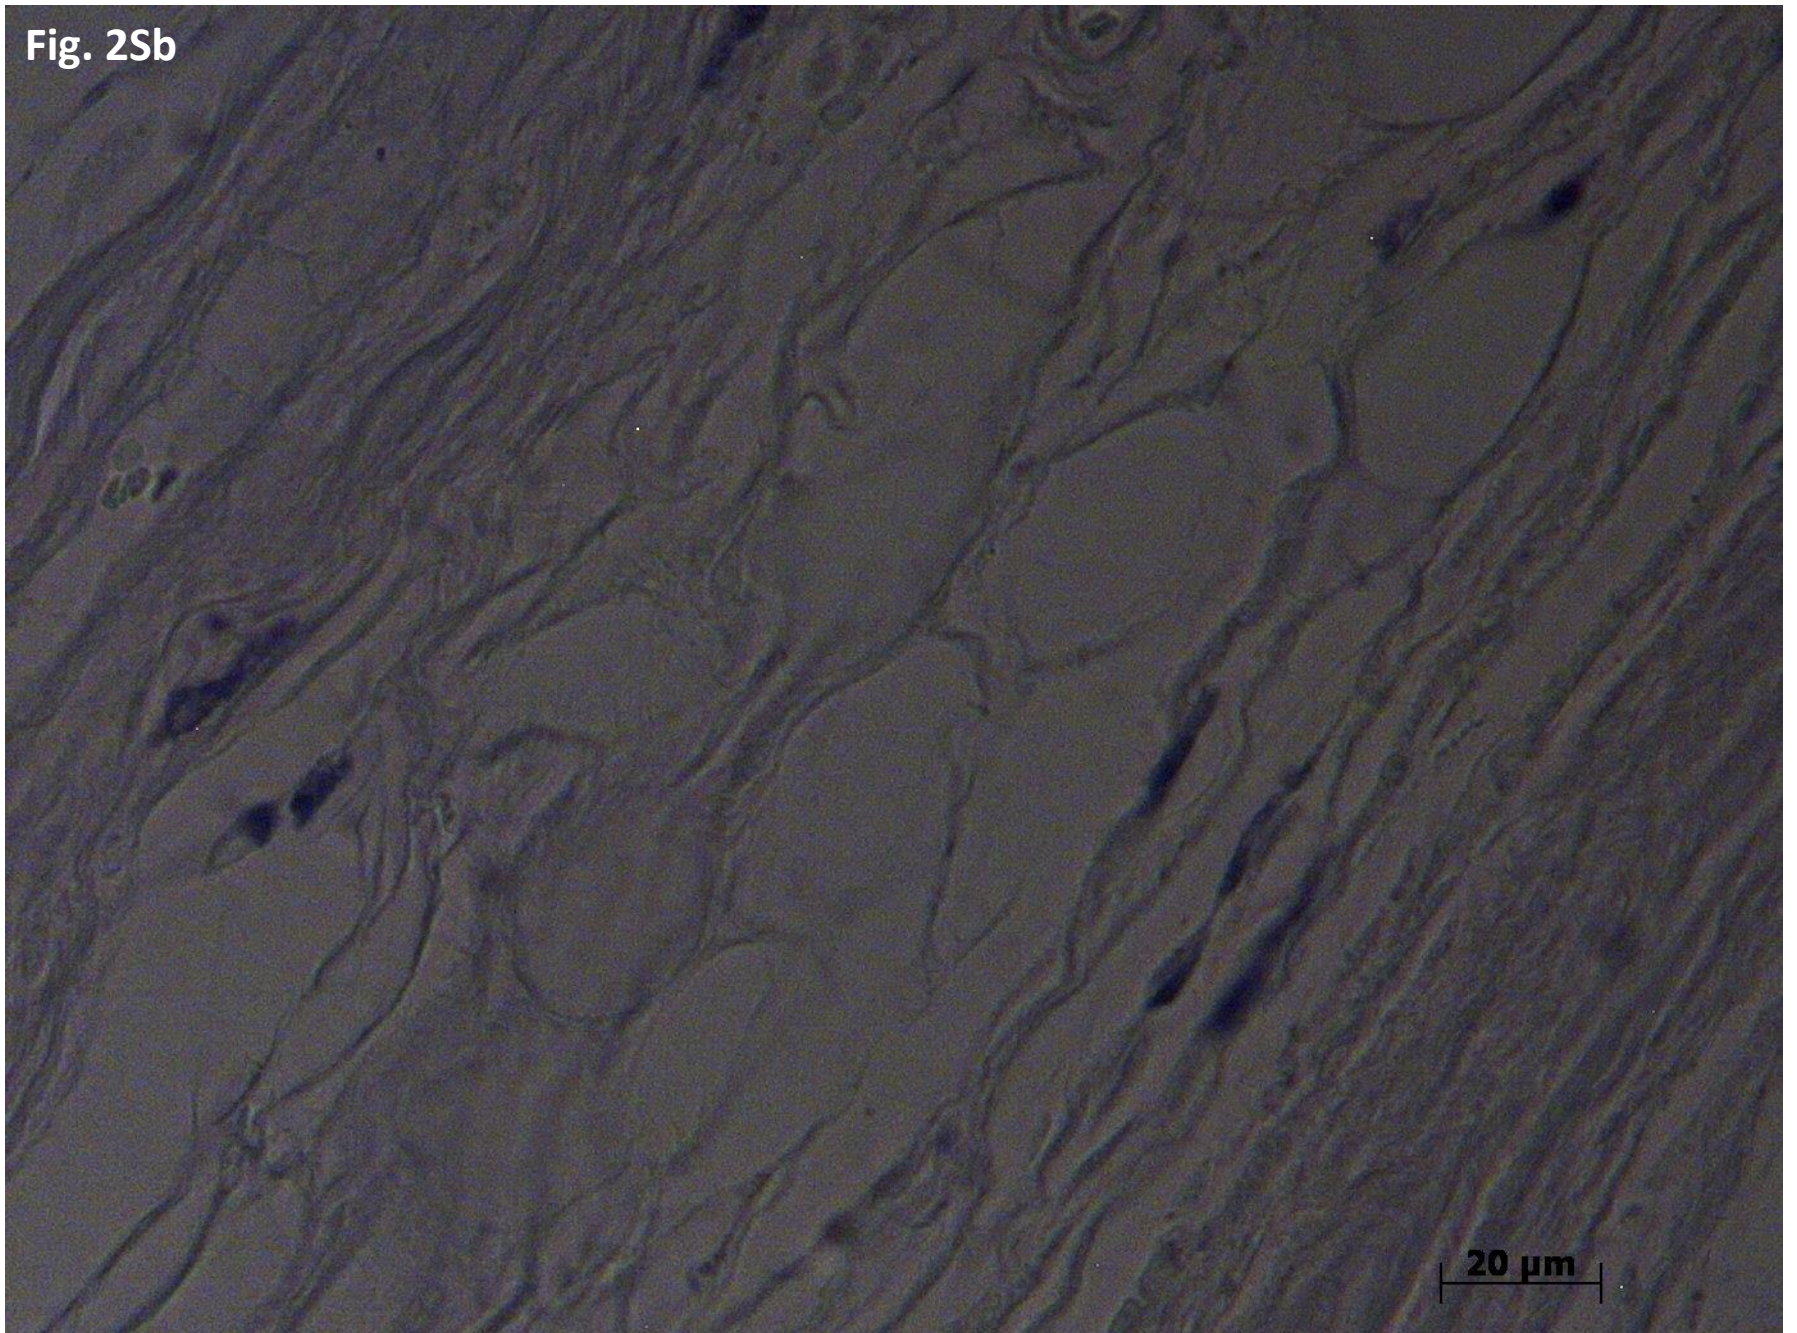



Fig. 2Sc

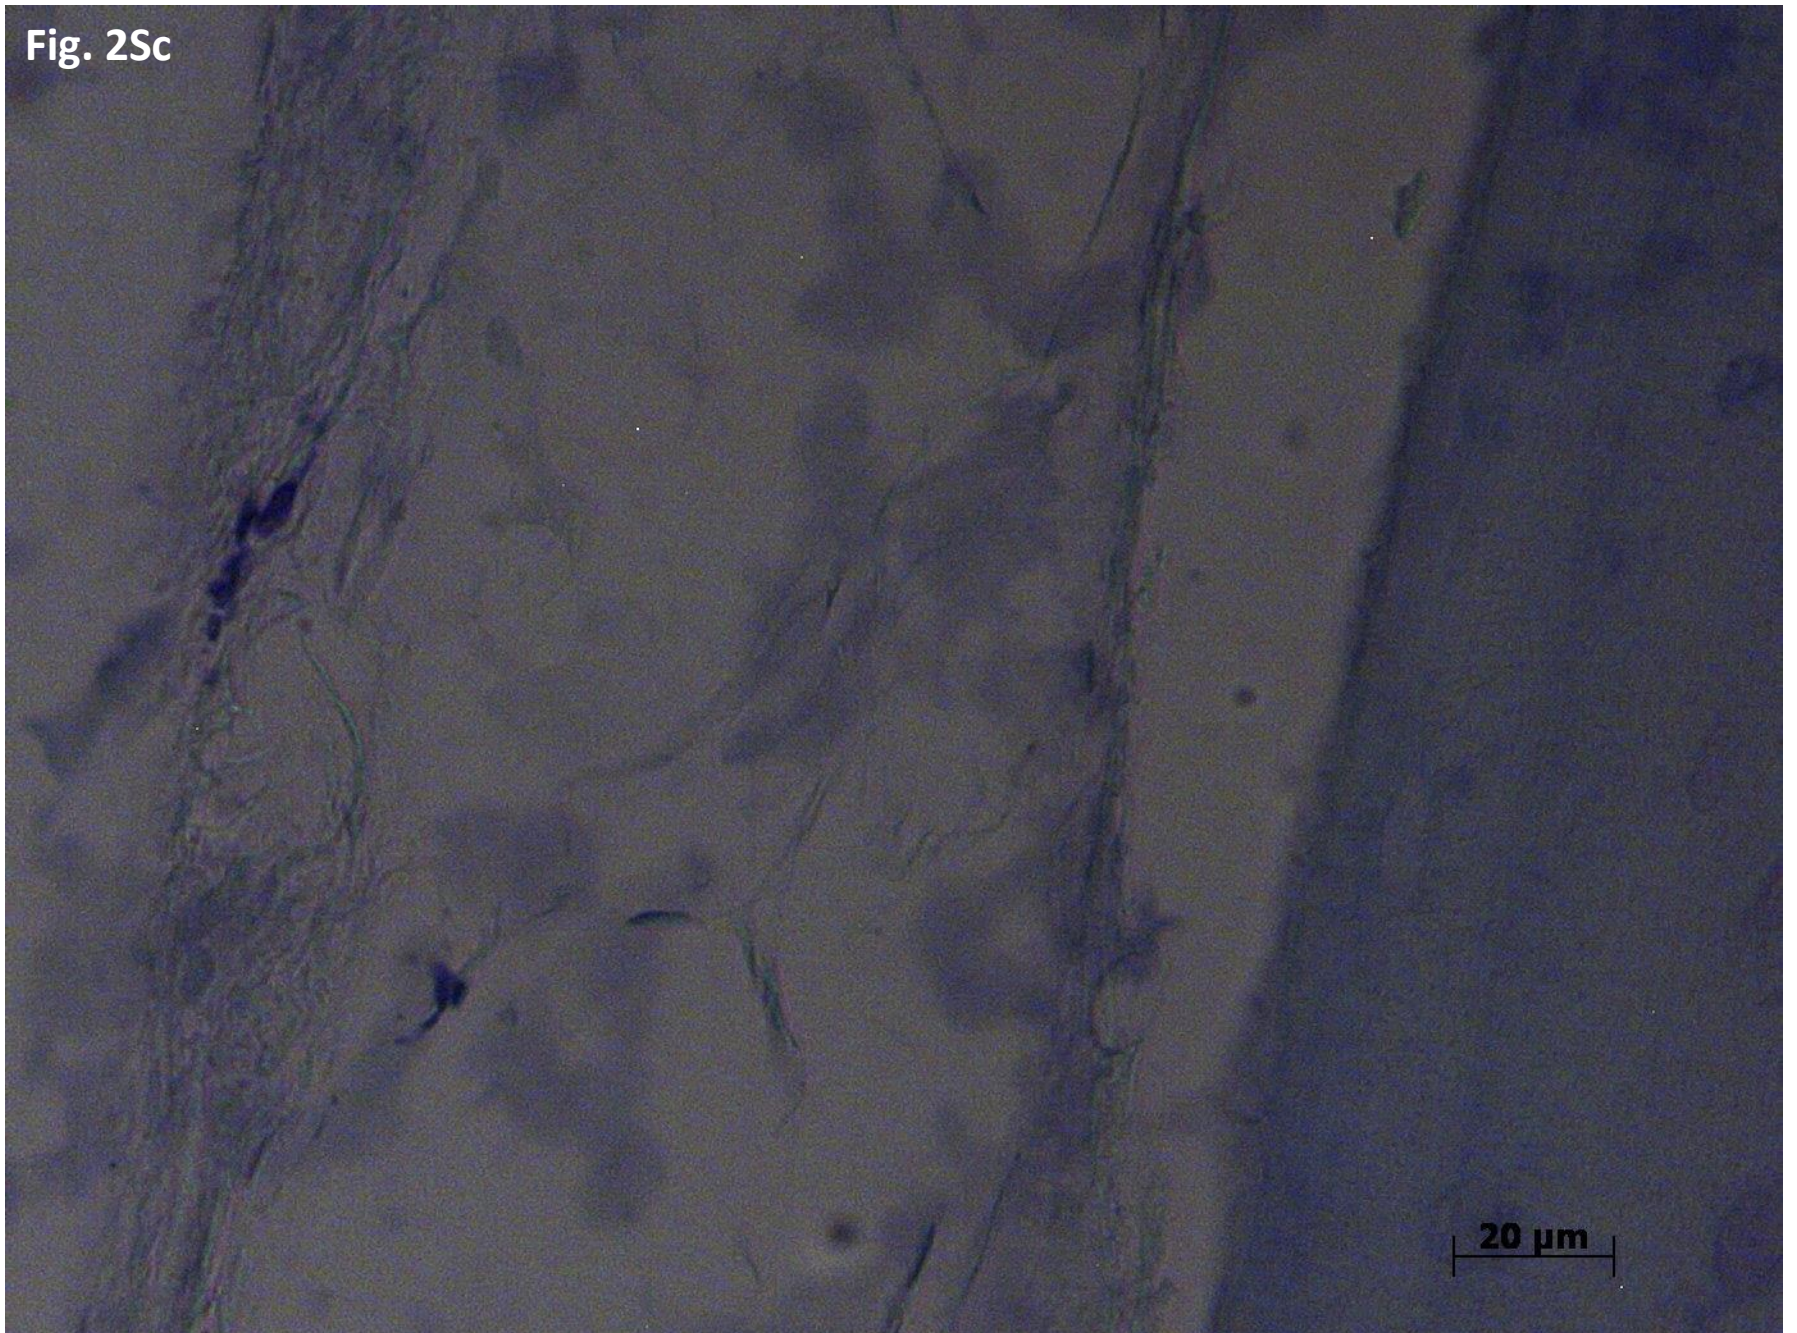



Fig. 2Sd

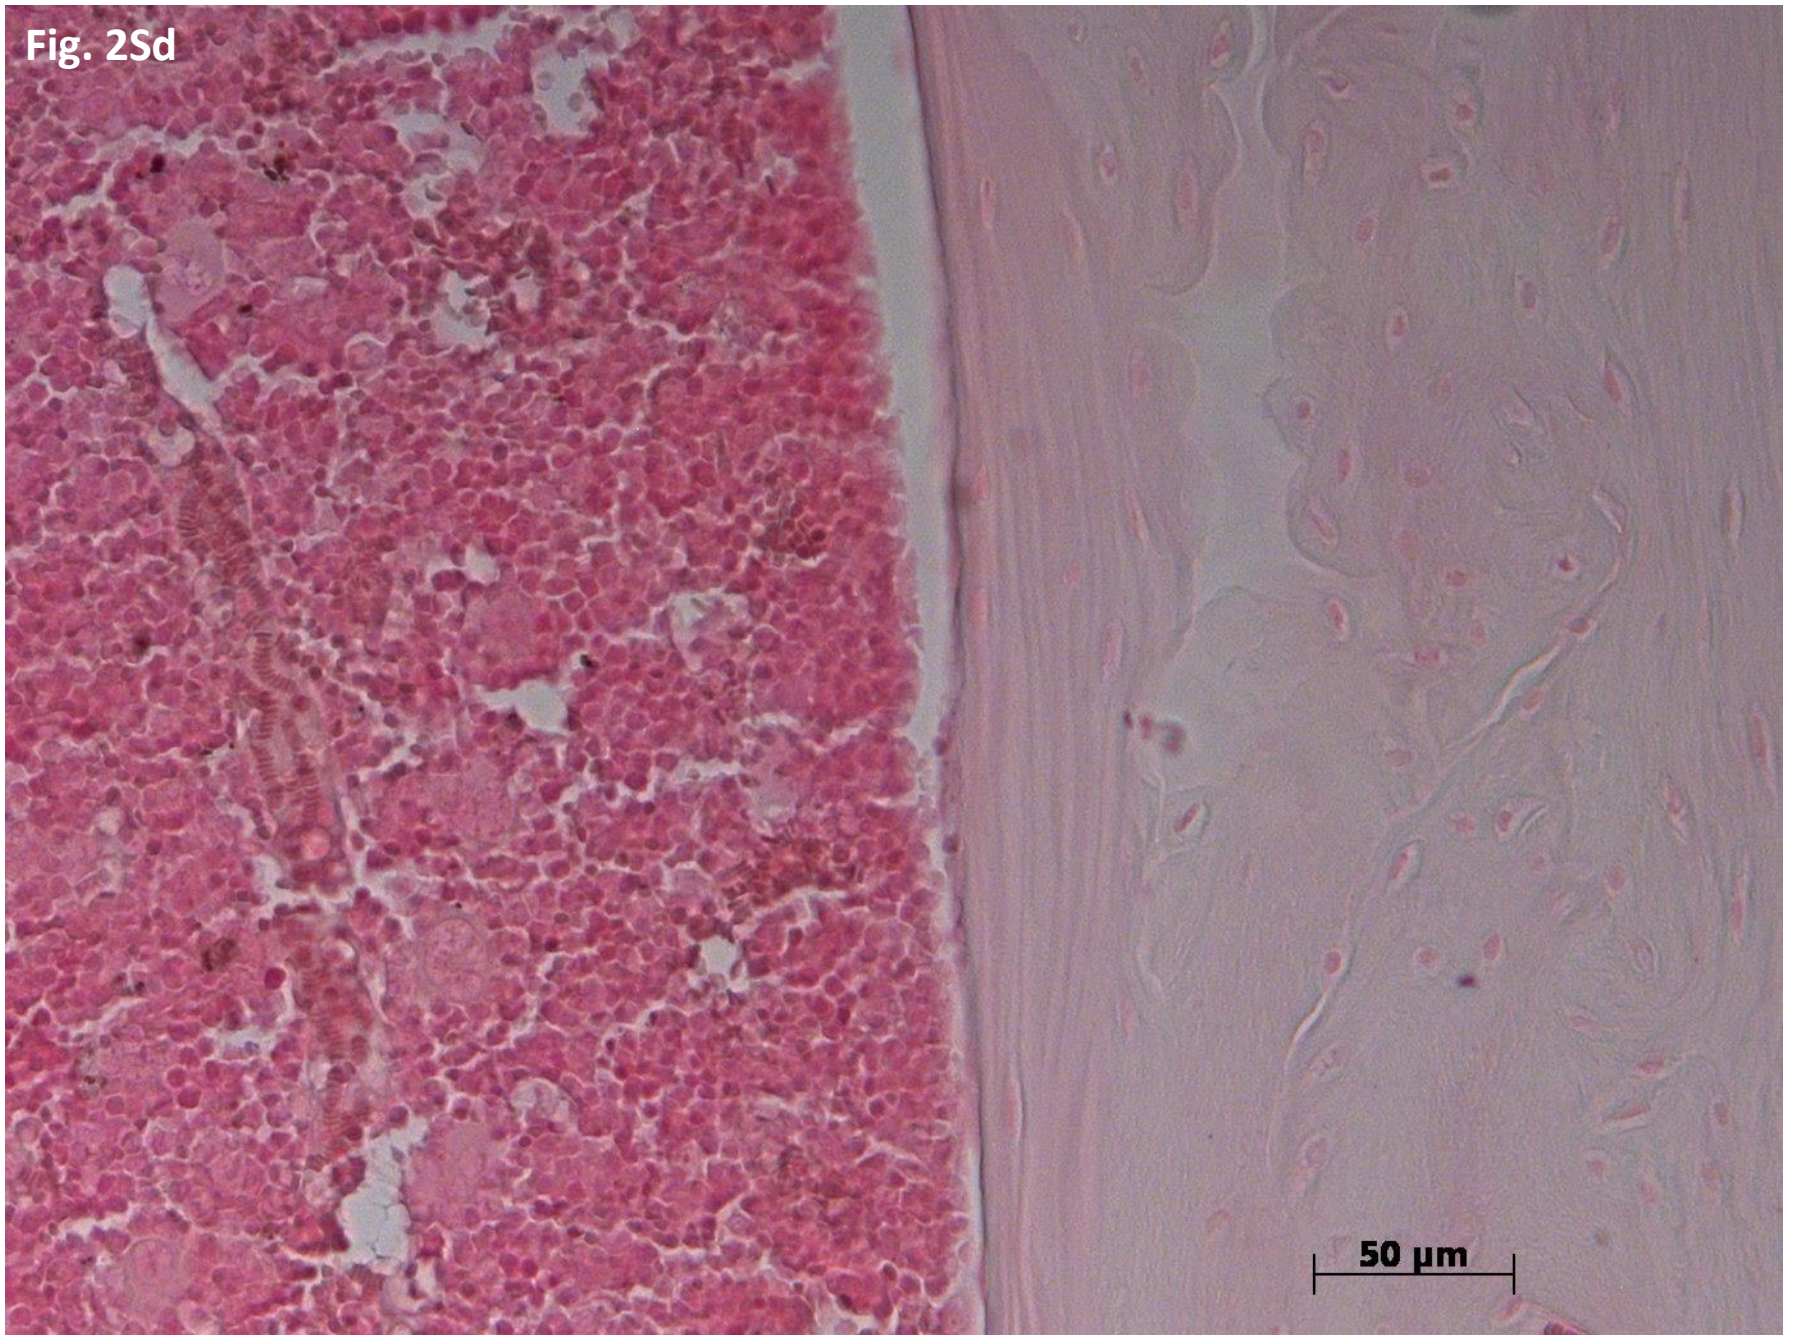



Fig. 2Se

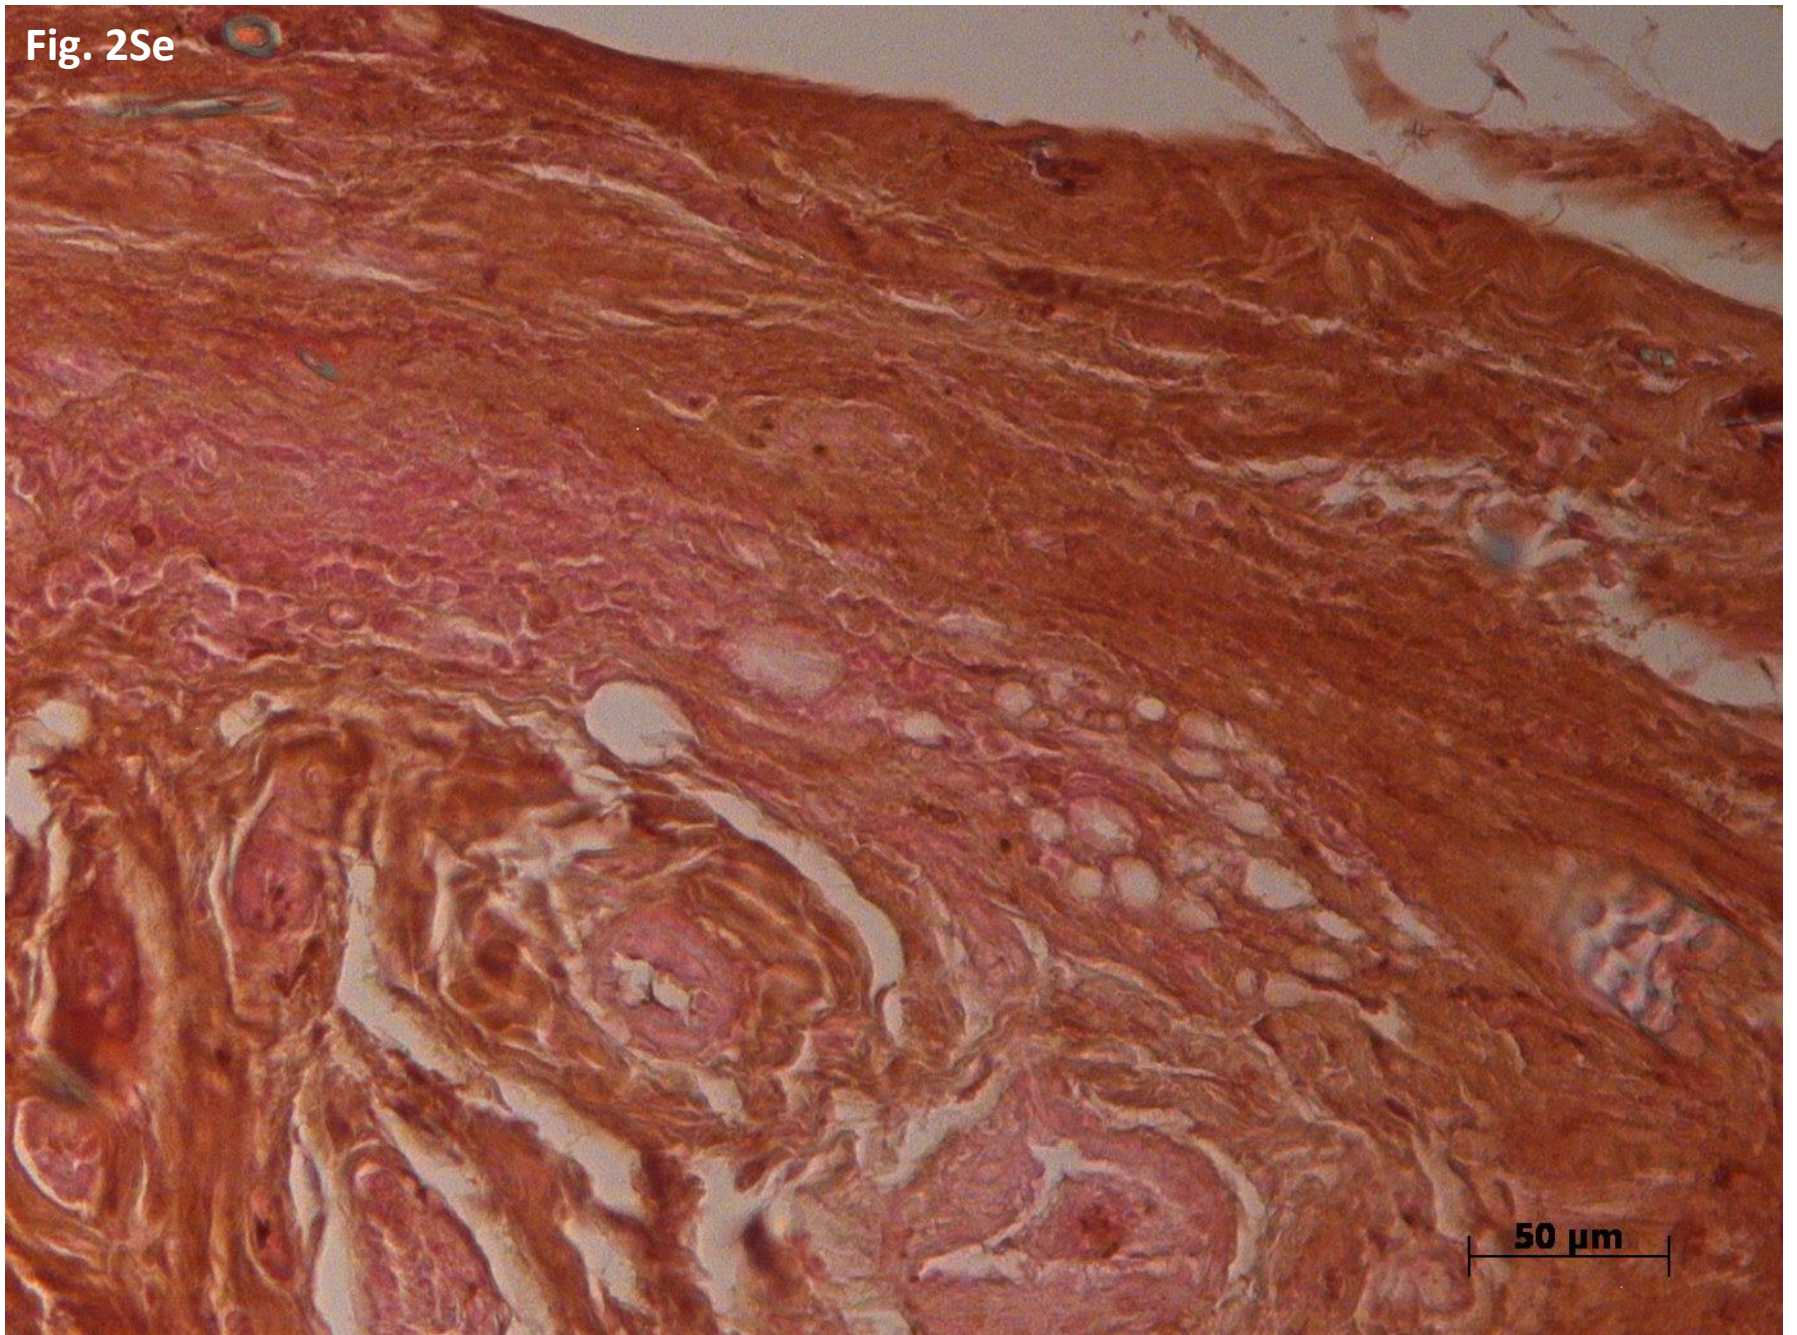



Fig. 2Sf

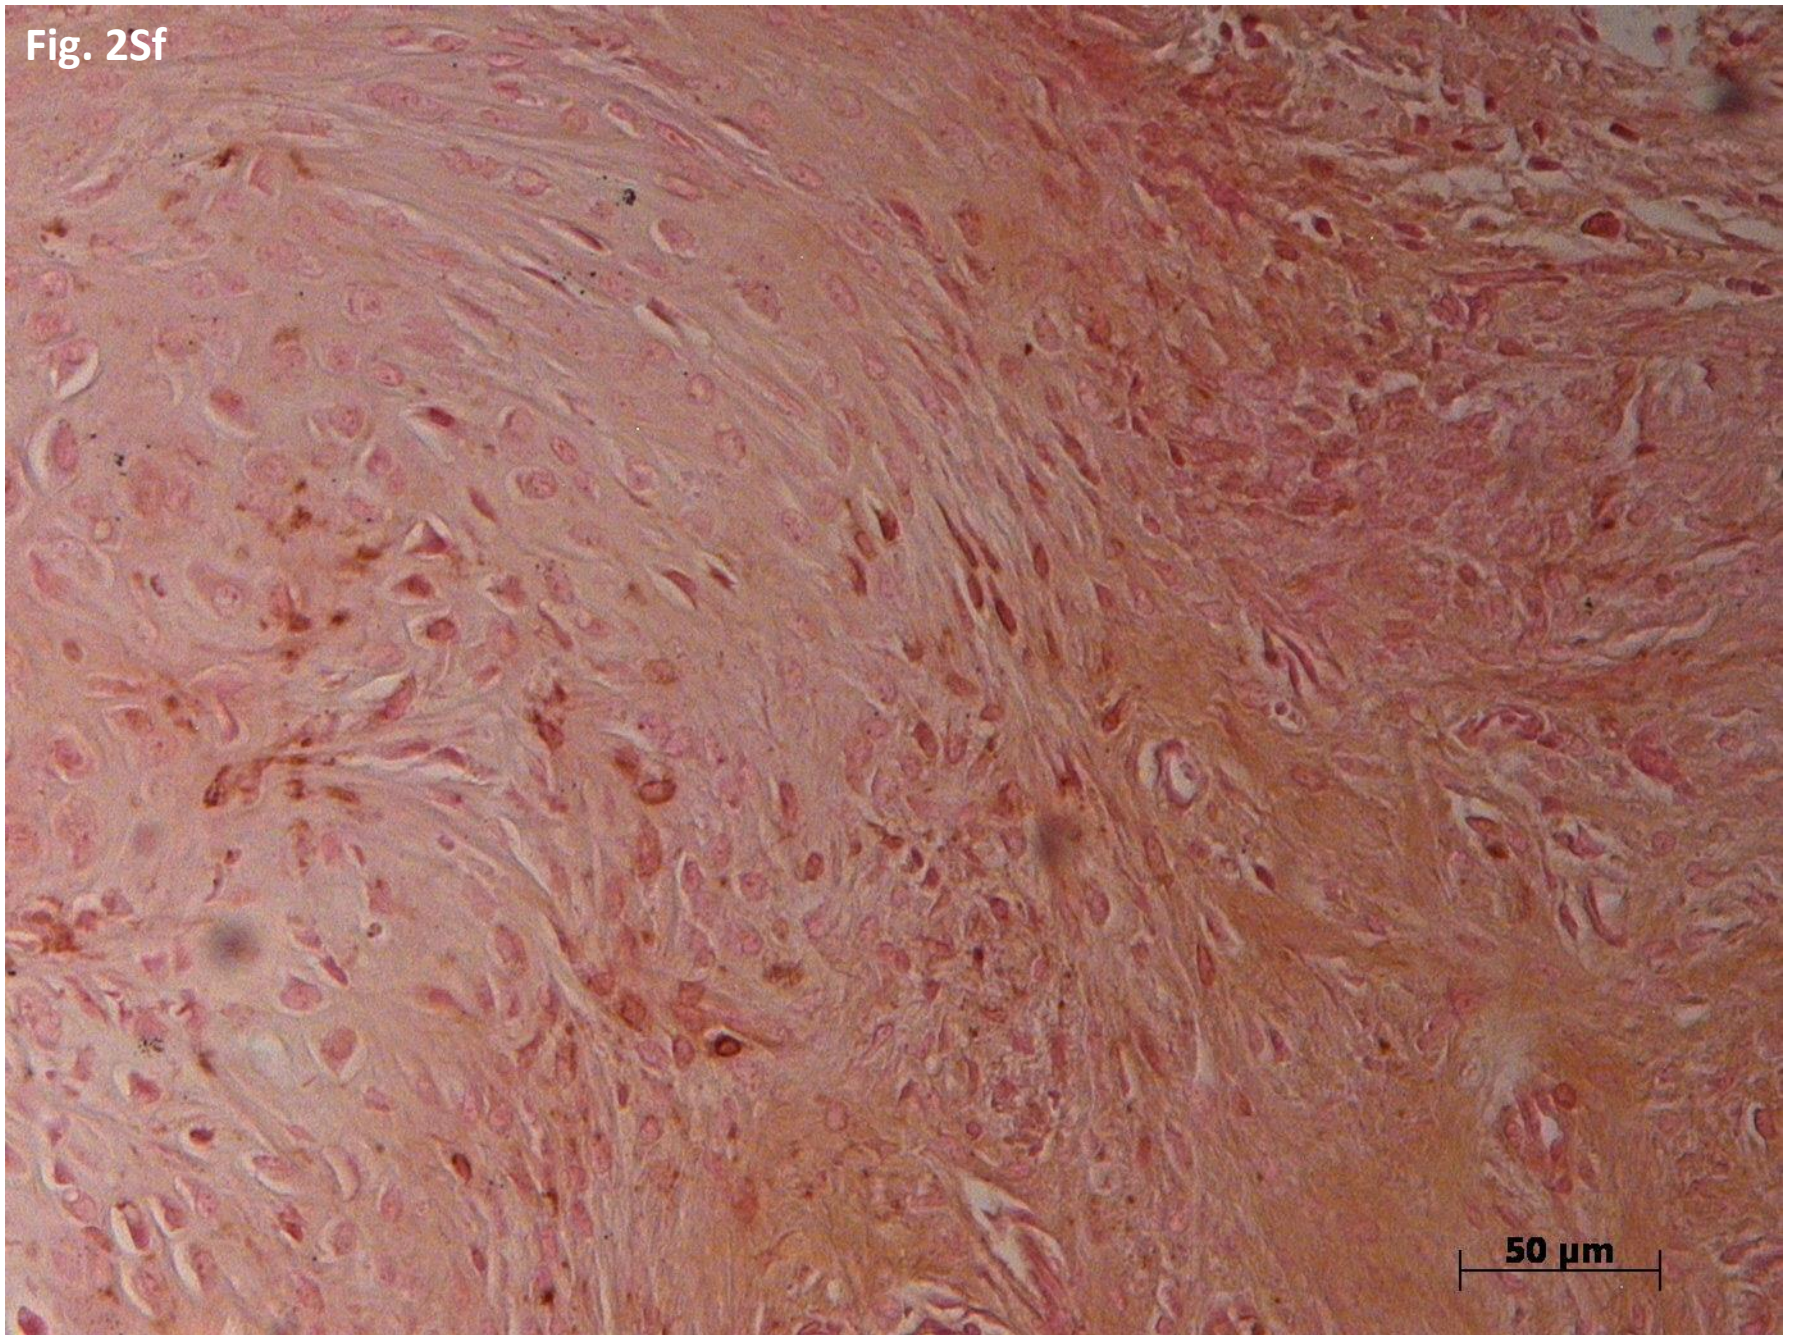

Supplement: pone.0178553.s002.pdf [file pone.0178553.s002.pdf]
