# Supplementary material for: Effect of a new formulation of micronized and ultramicronized N-palmitoylethanolamine in a tibia fracture mouse model of complex regional pain syndrome
Source: PubMed Central journal article supplement (PMC5464592; doi:10.1371/journal.pone.0178553), 2017-06-08

Fig. 6a

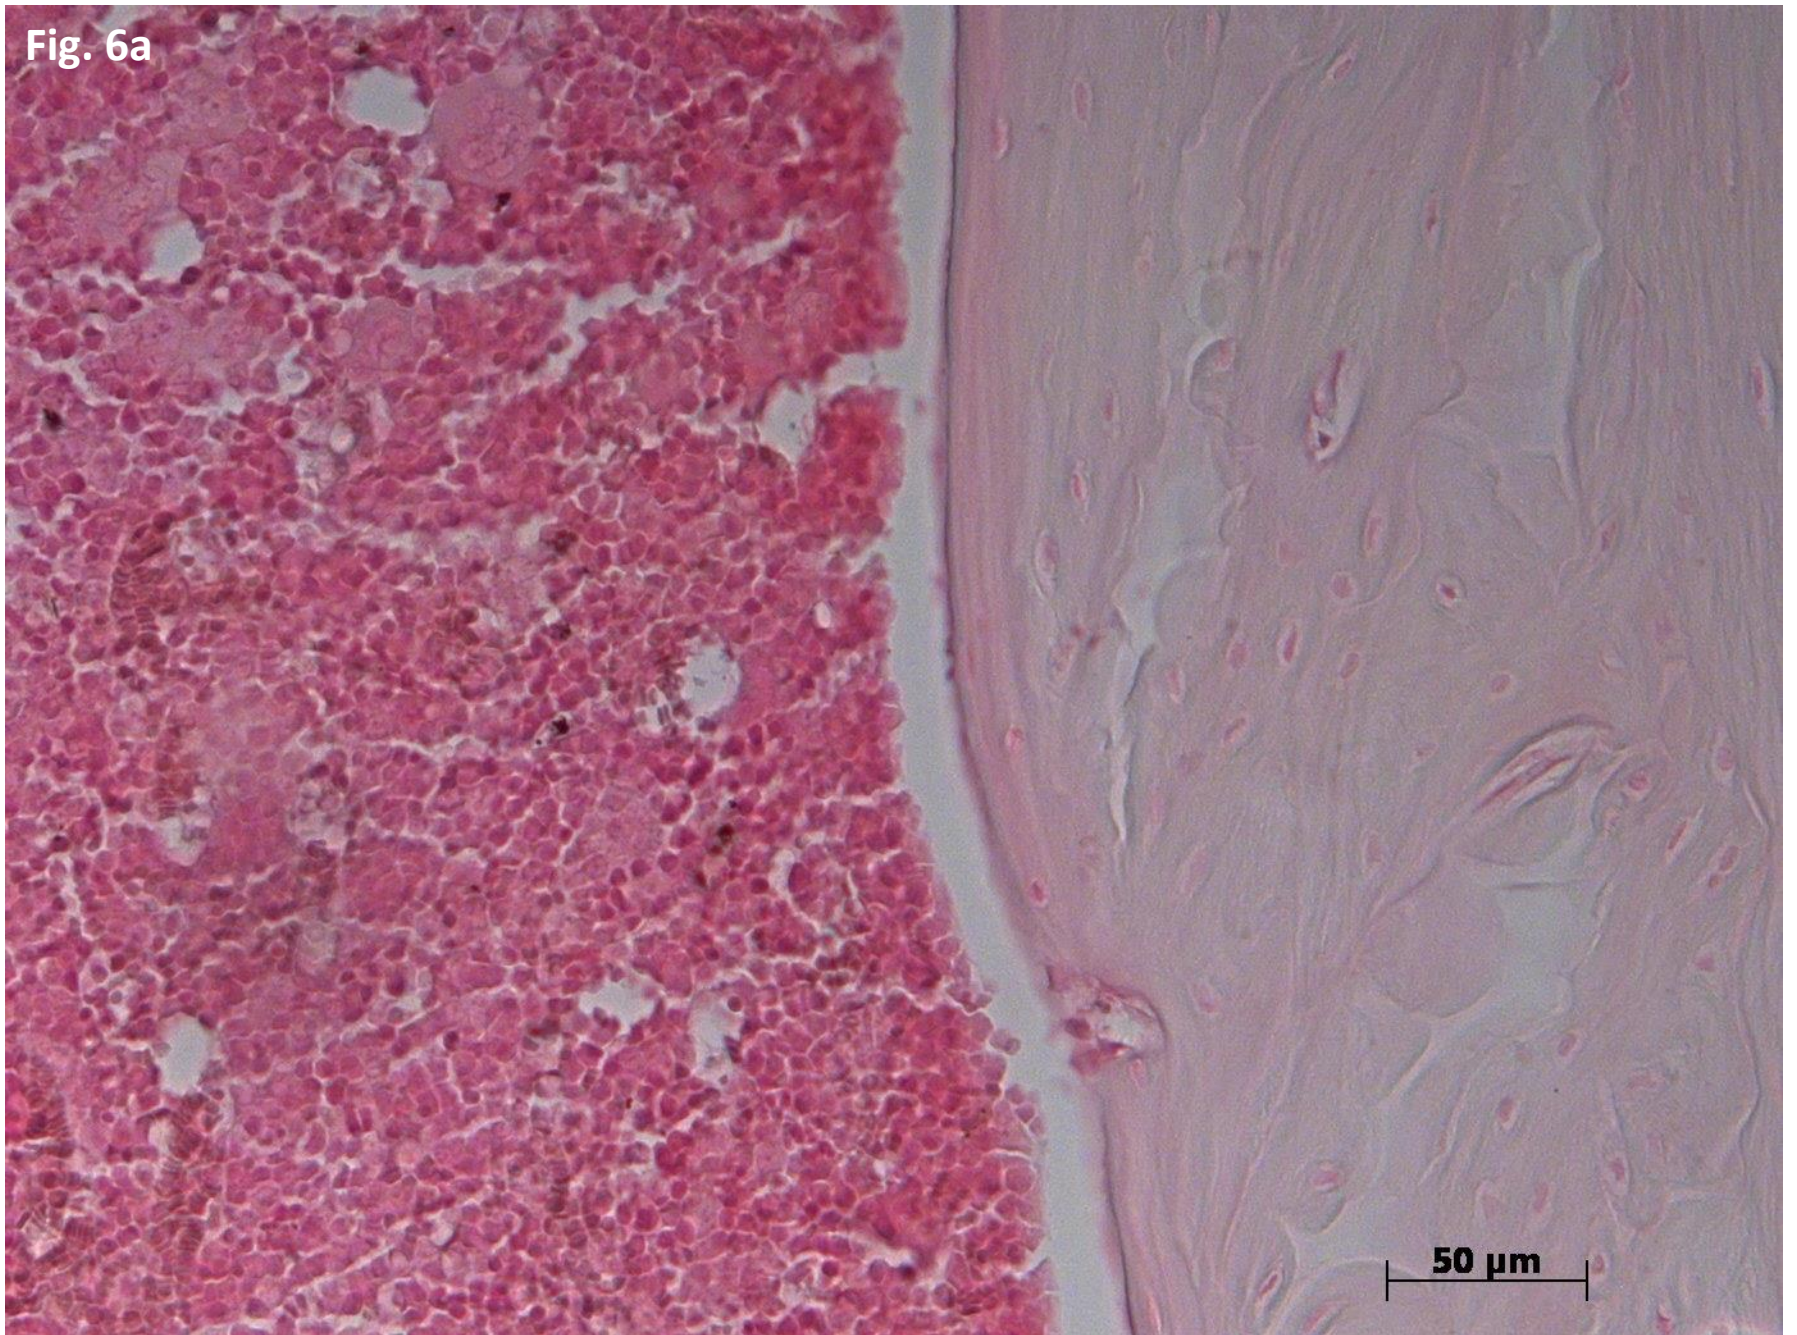



Fig. 6b

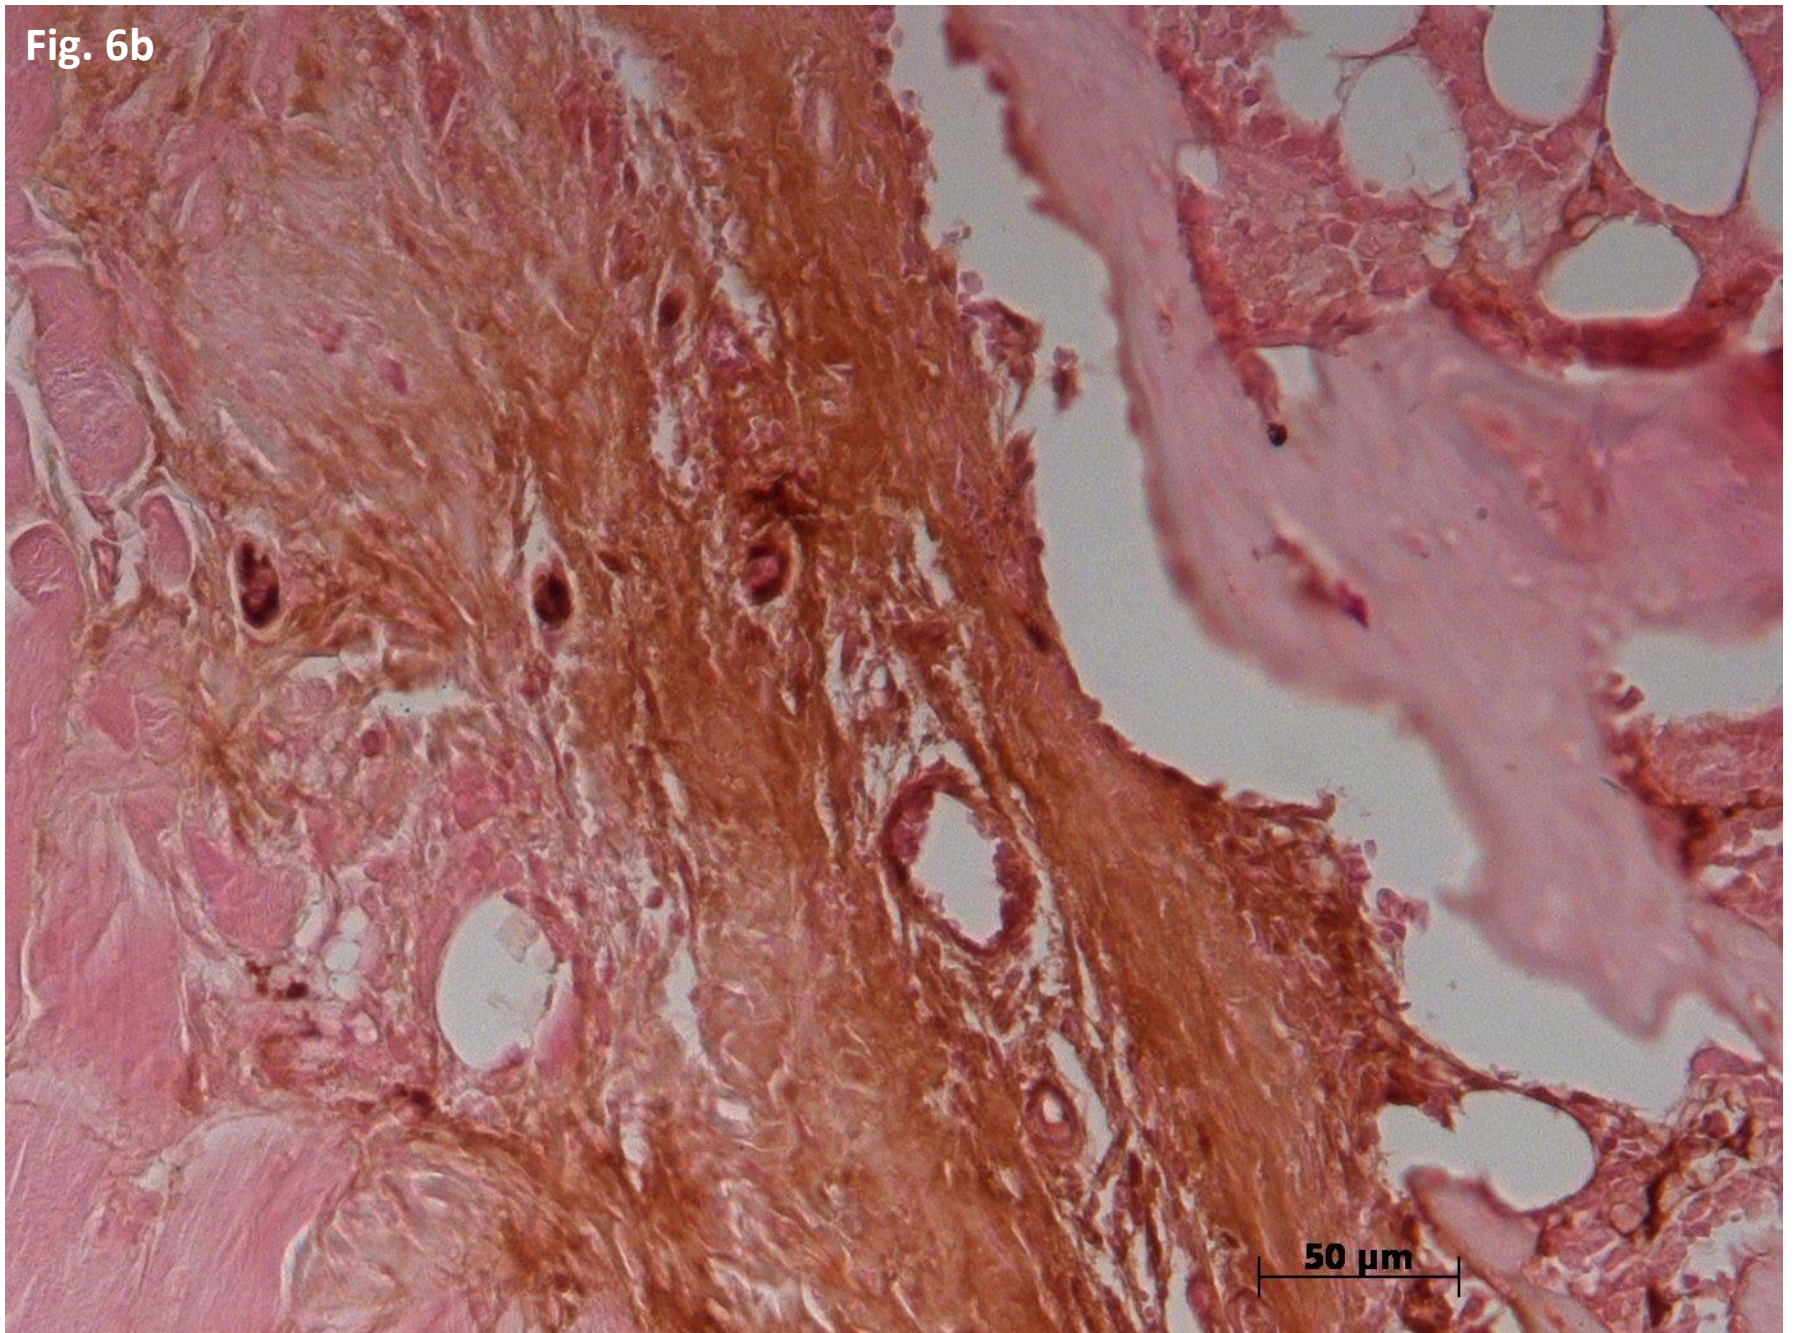



Fig. 6c

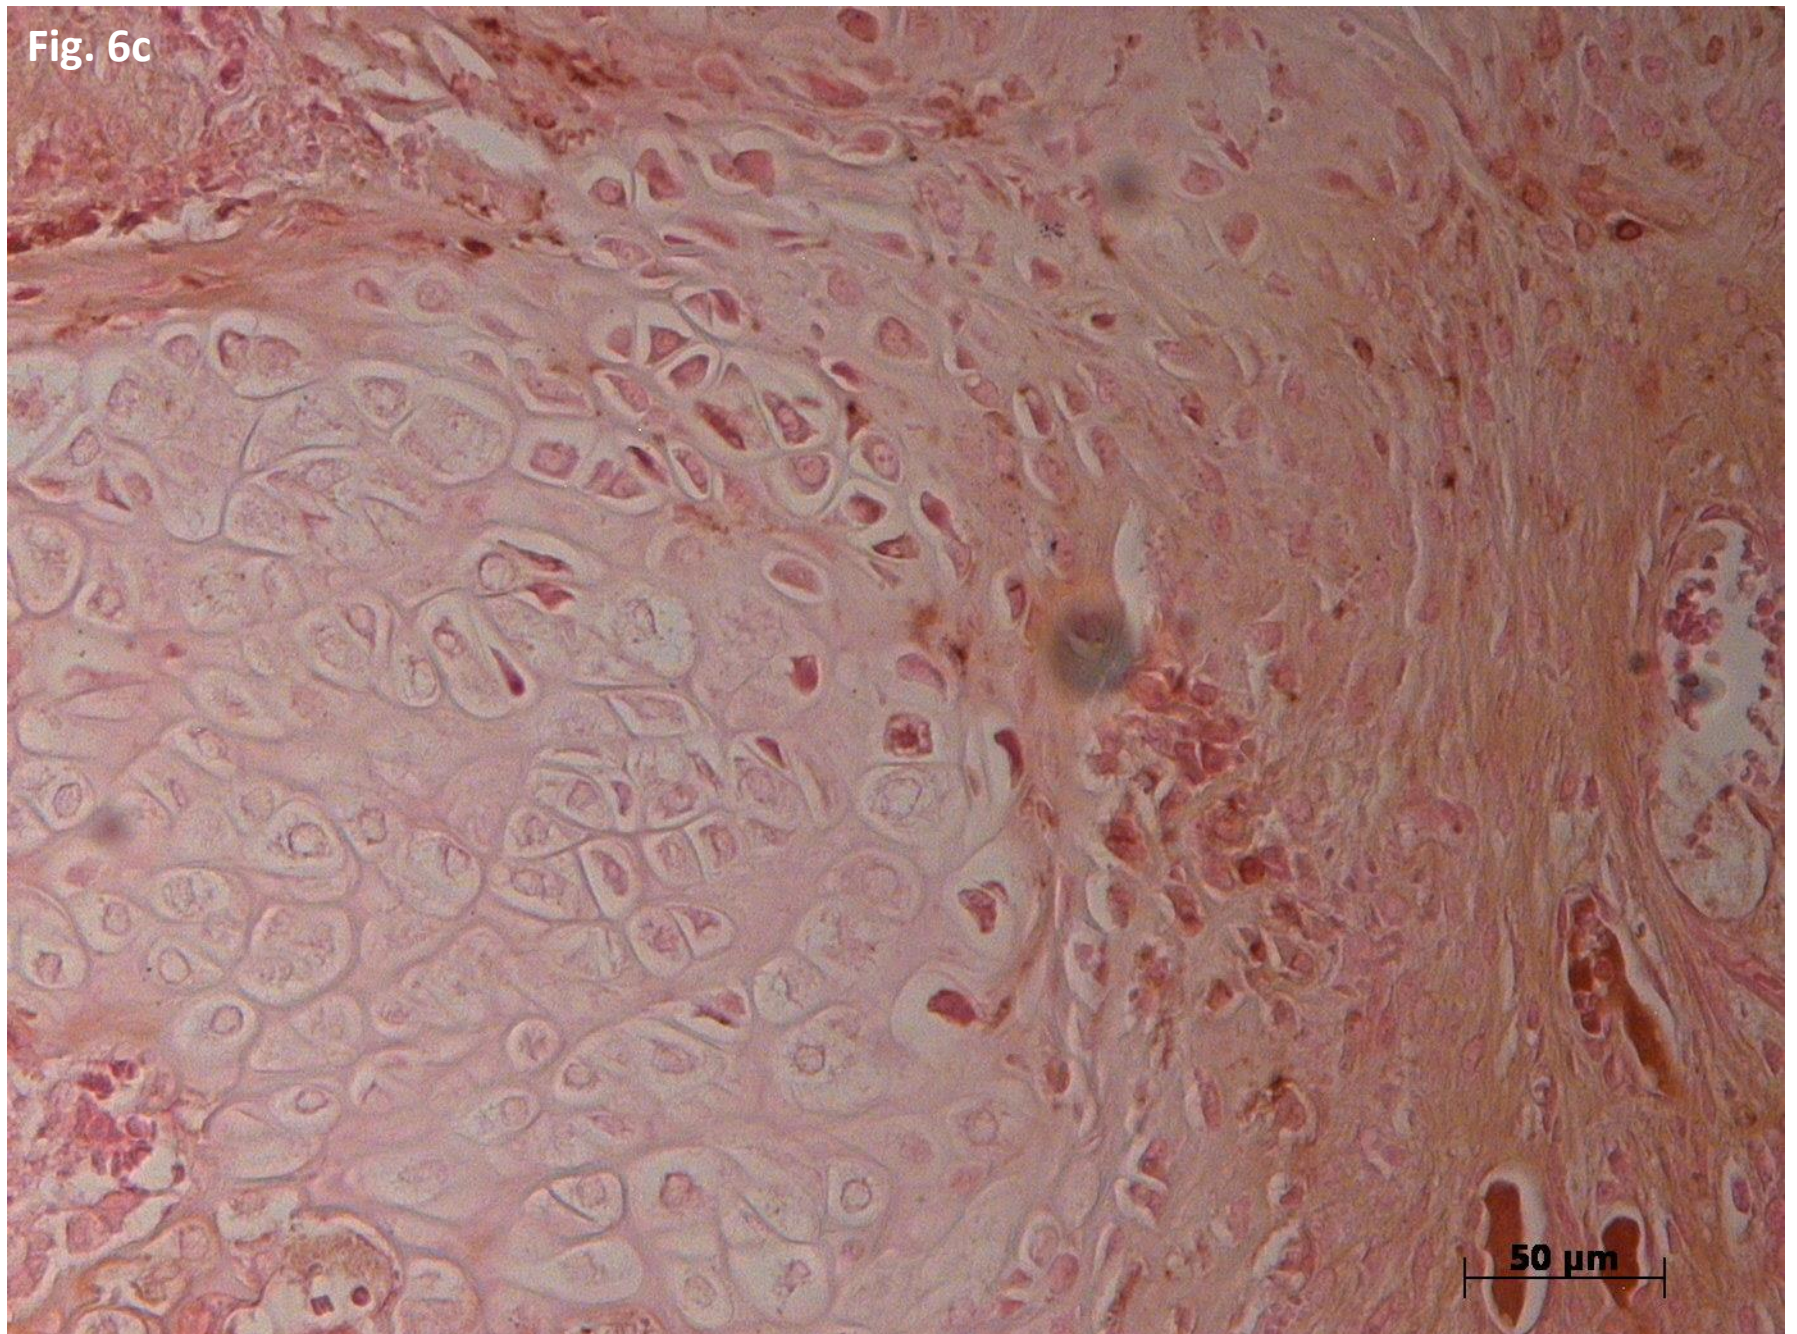



Fig. 6d

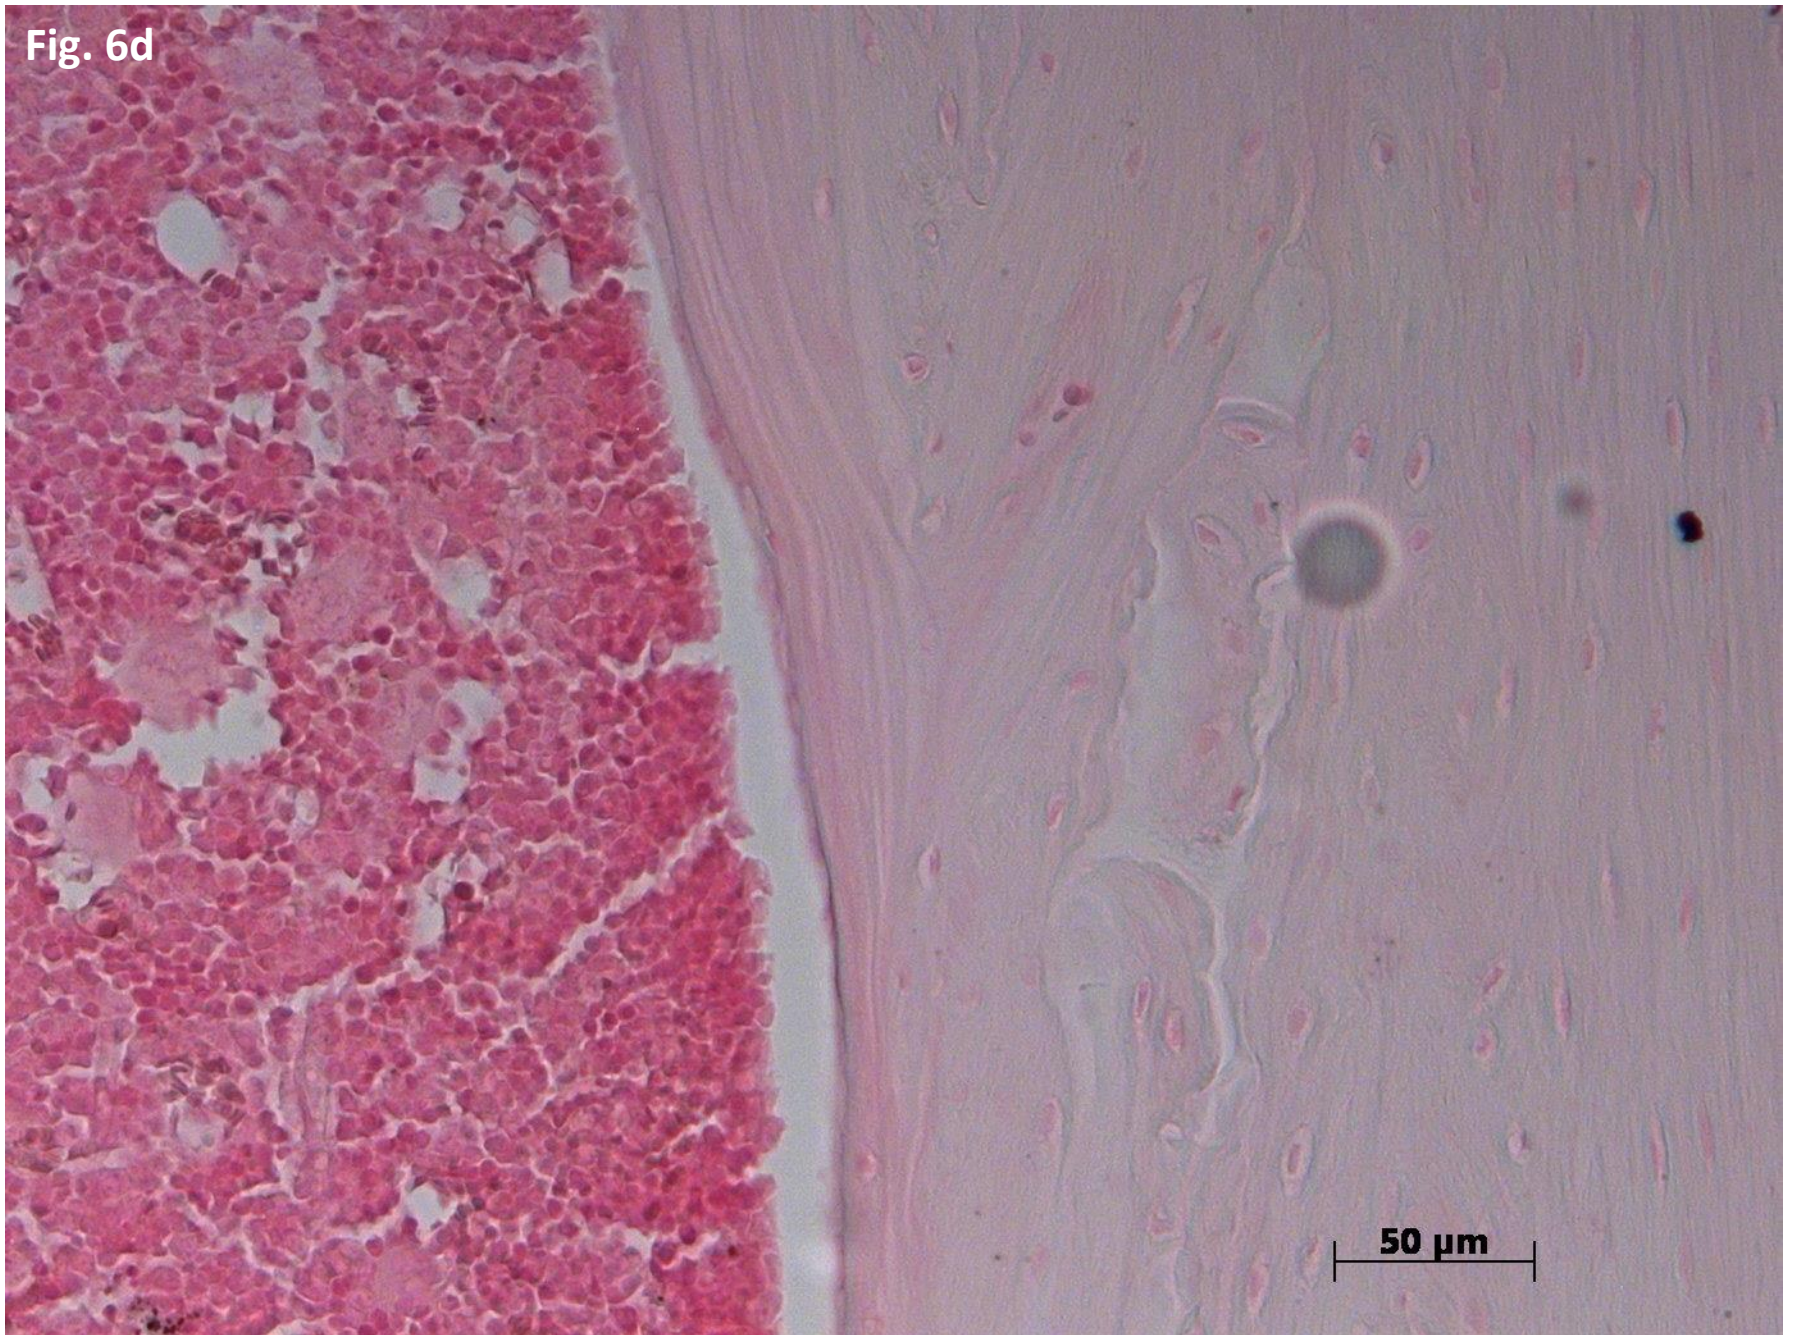



Fig. 6e

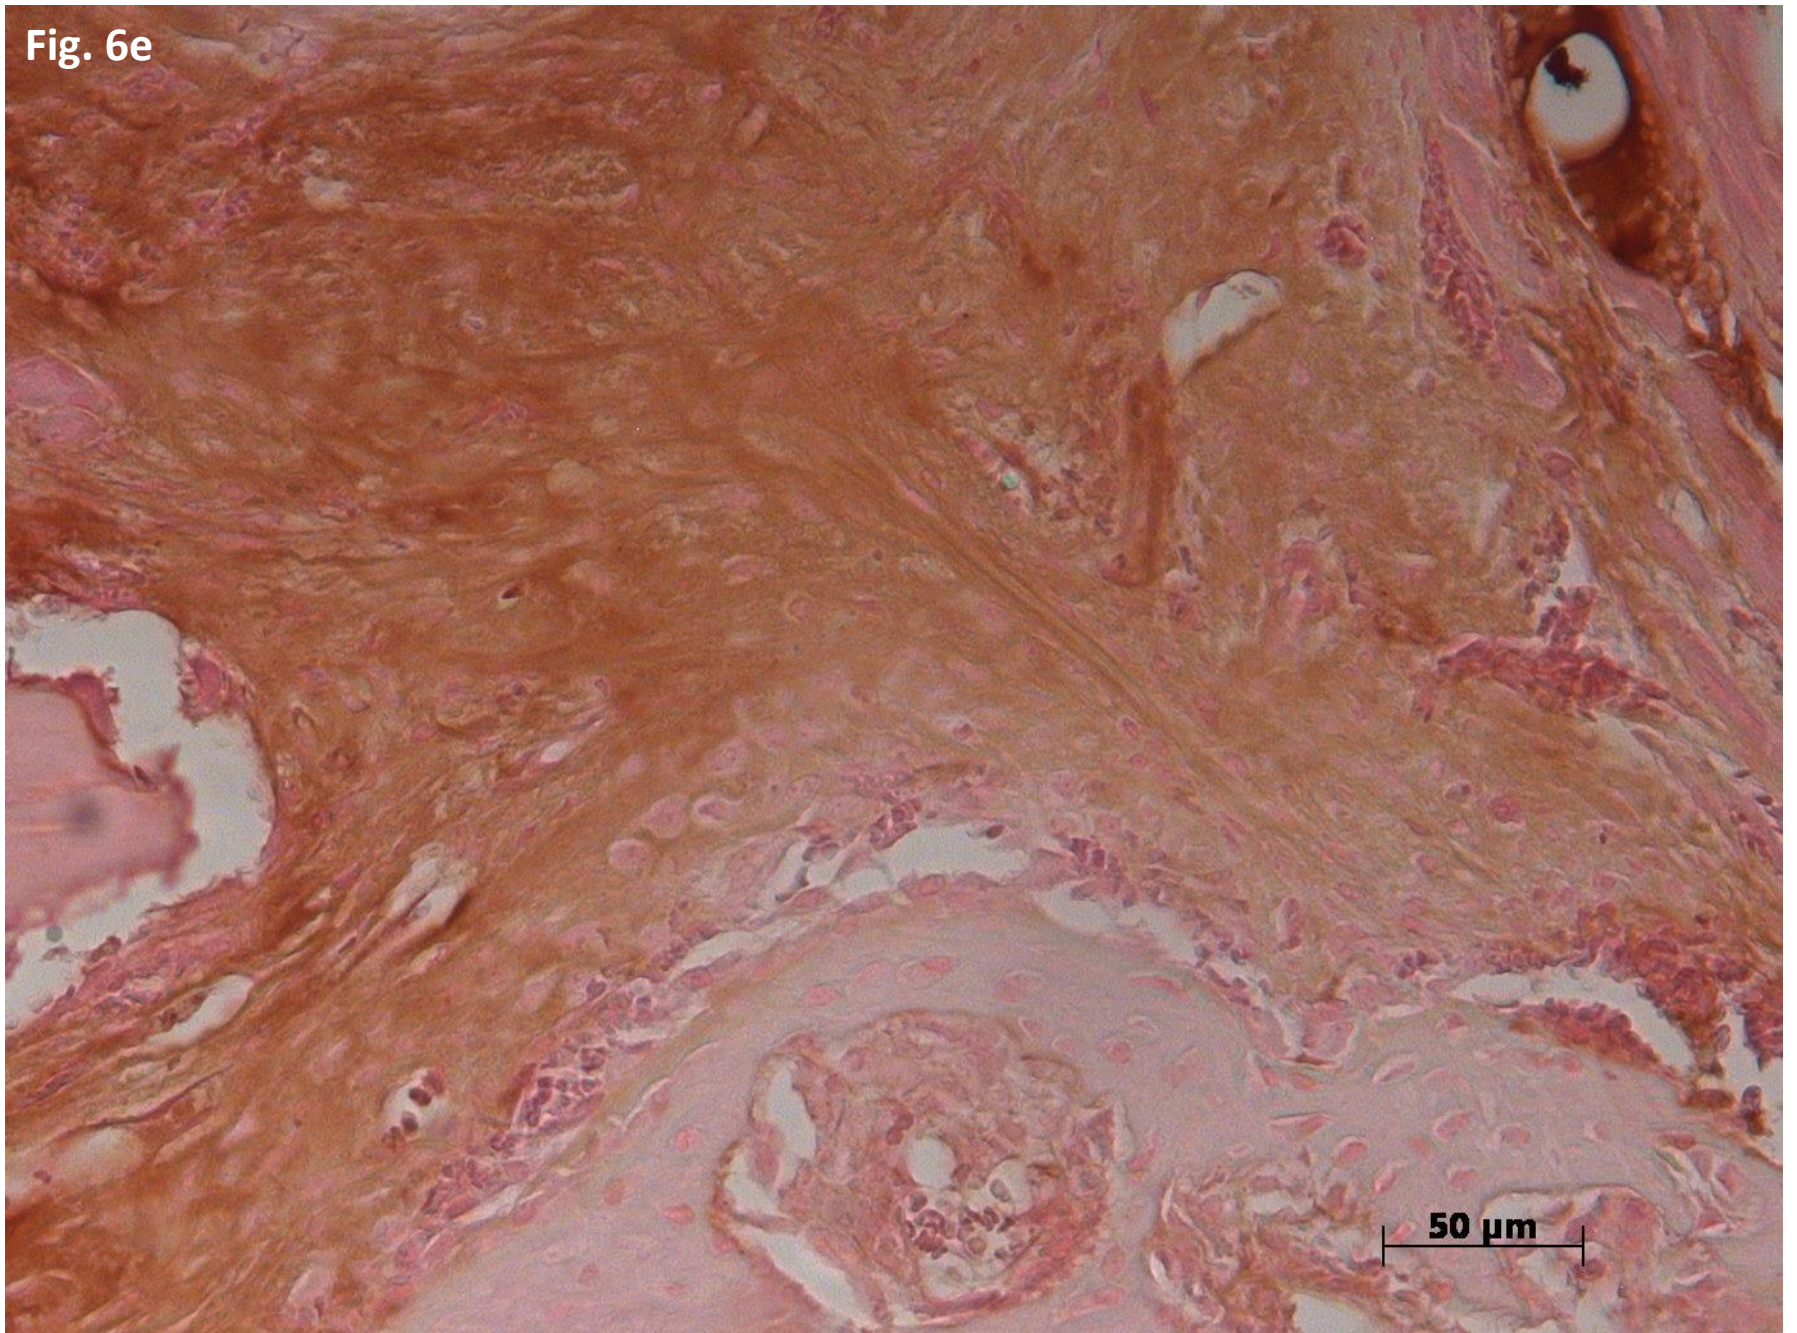



Fig. 6f

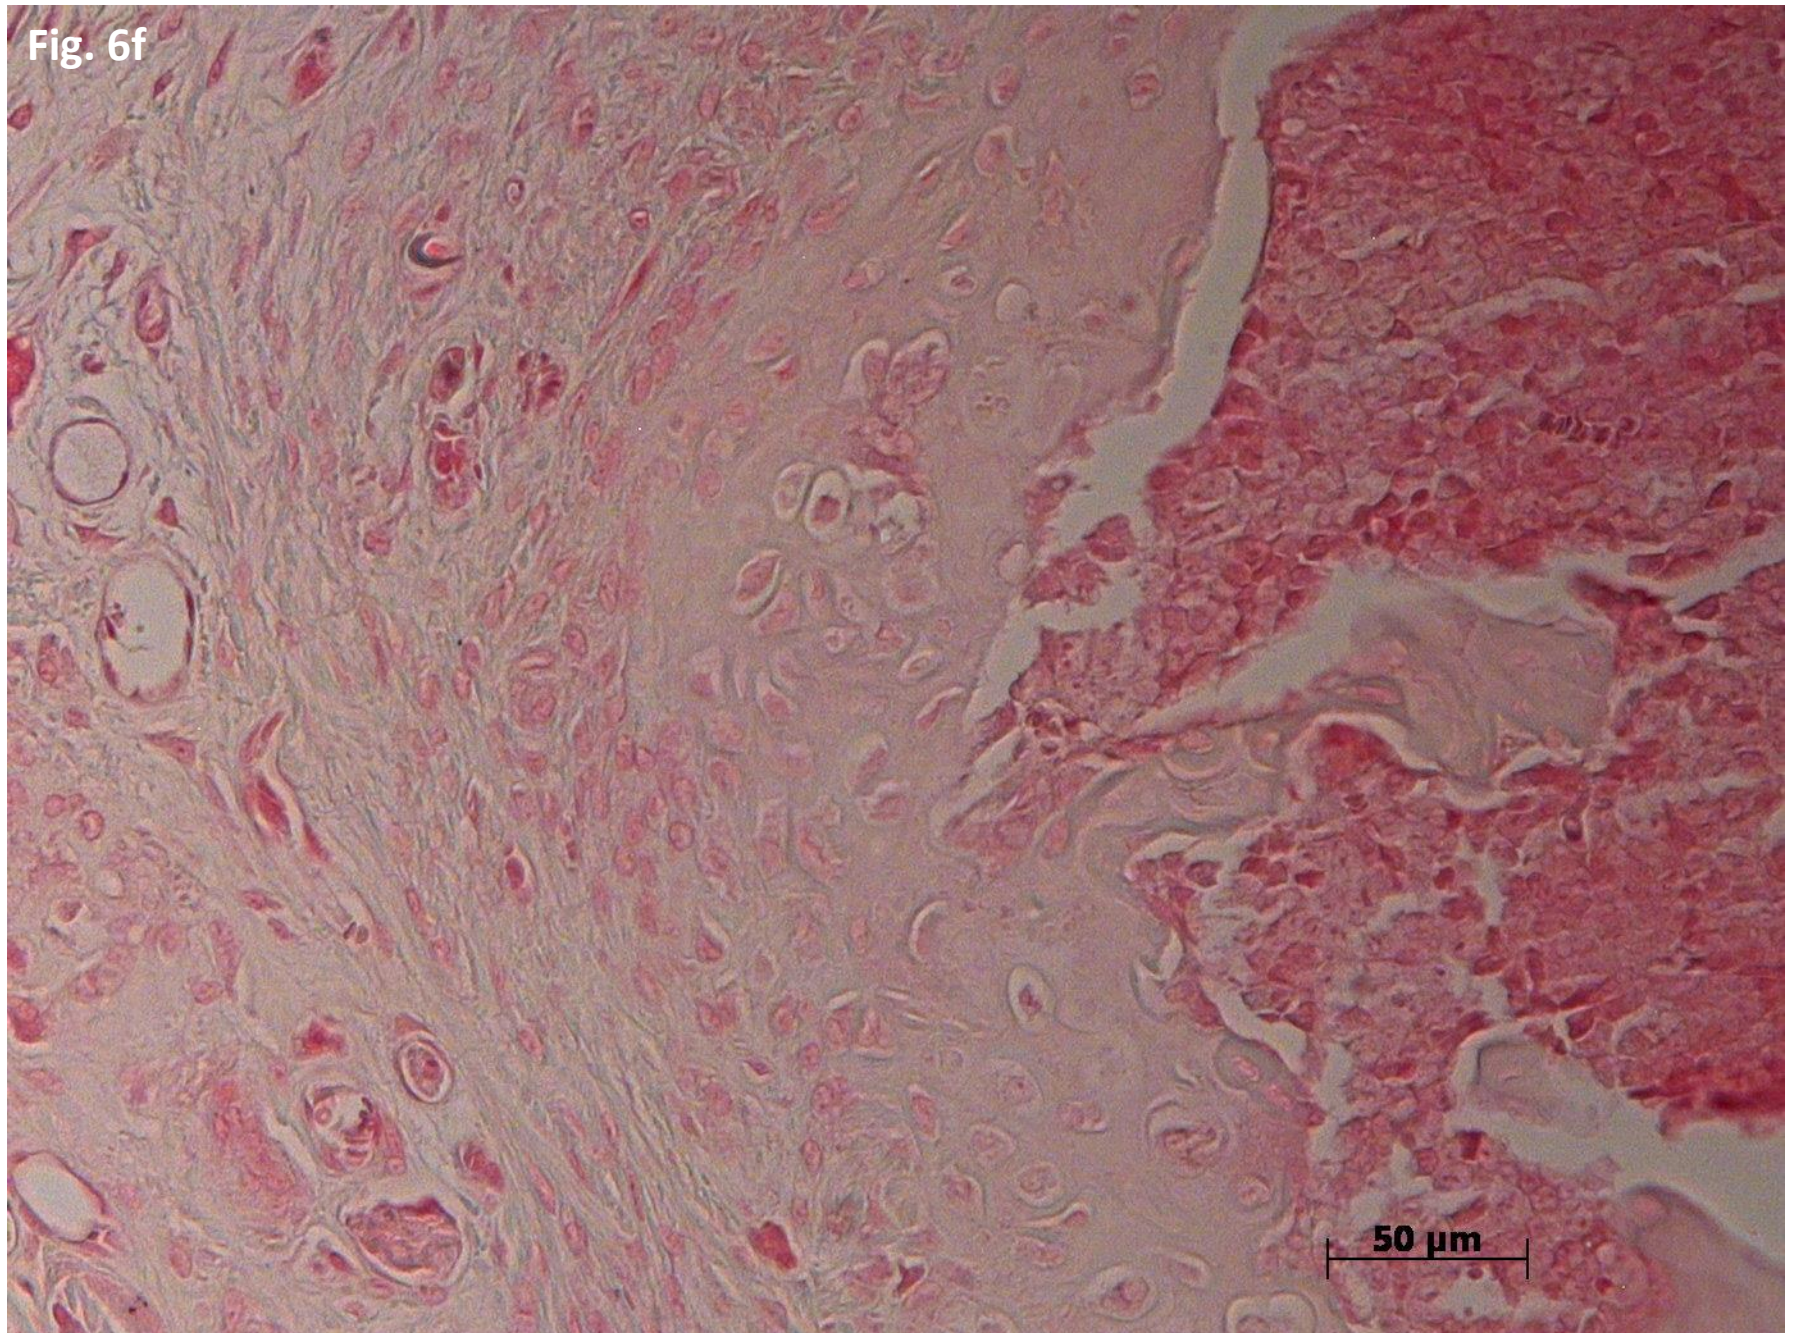

Supplement: pone.0178553.s006.pdf [file pone.0178553.s006.pdf]
