# Supplementary material for: Effect of a new formulation of micronized and ultramicronized N-palmitoylethanolamine in a tibia fracture mouse model of complex regional pain syndrome
Source: PubMed Central journal article supplement (PMC5464592; doi:10.1371/journal.pone.0178553), 2017-06-08

Fig. 7a

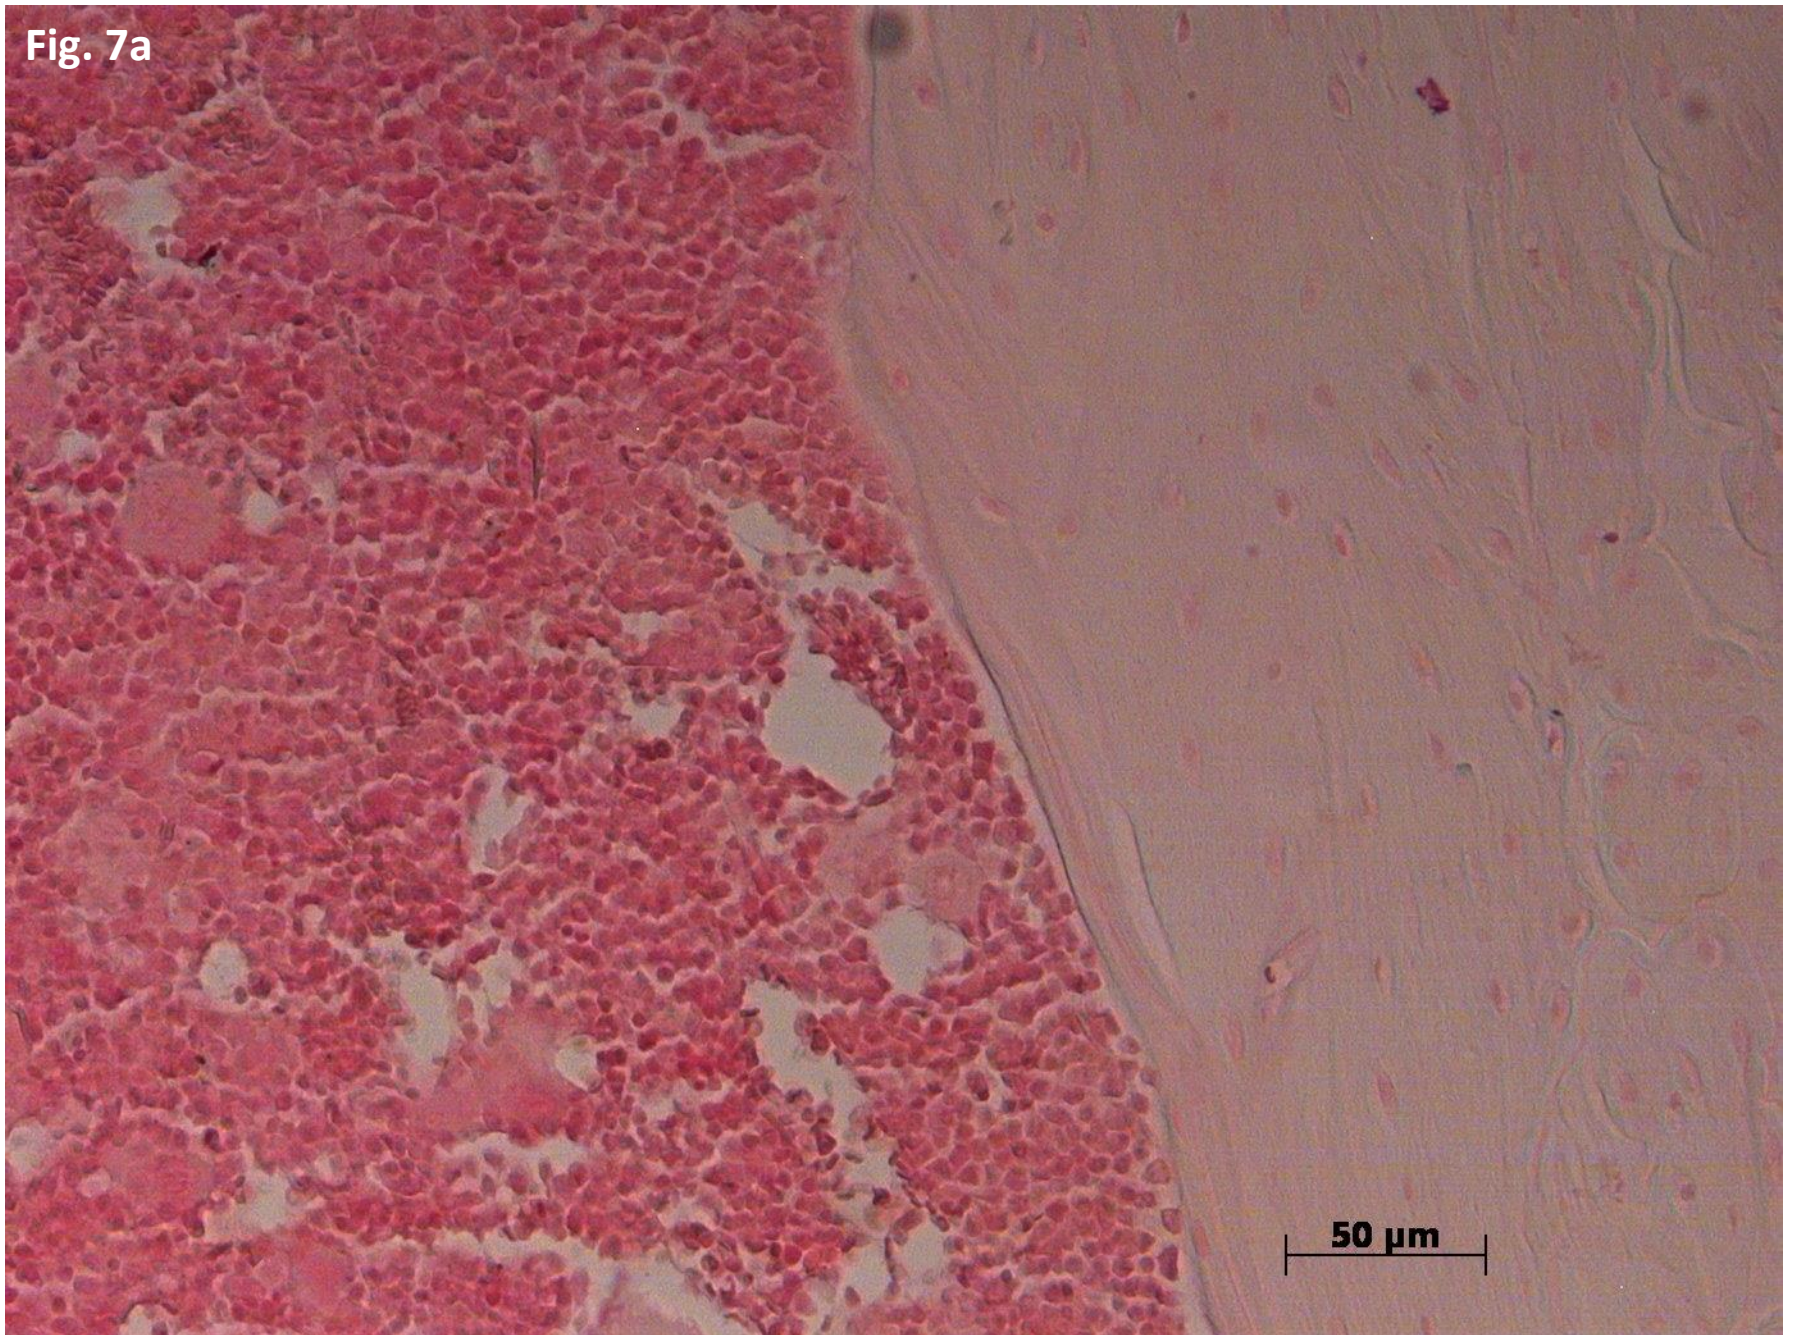



Fig. 7b

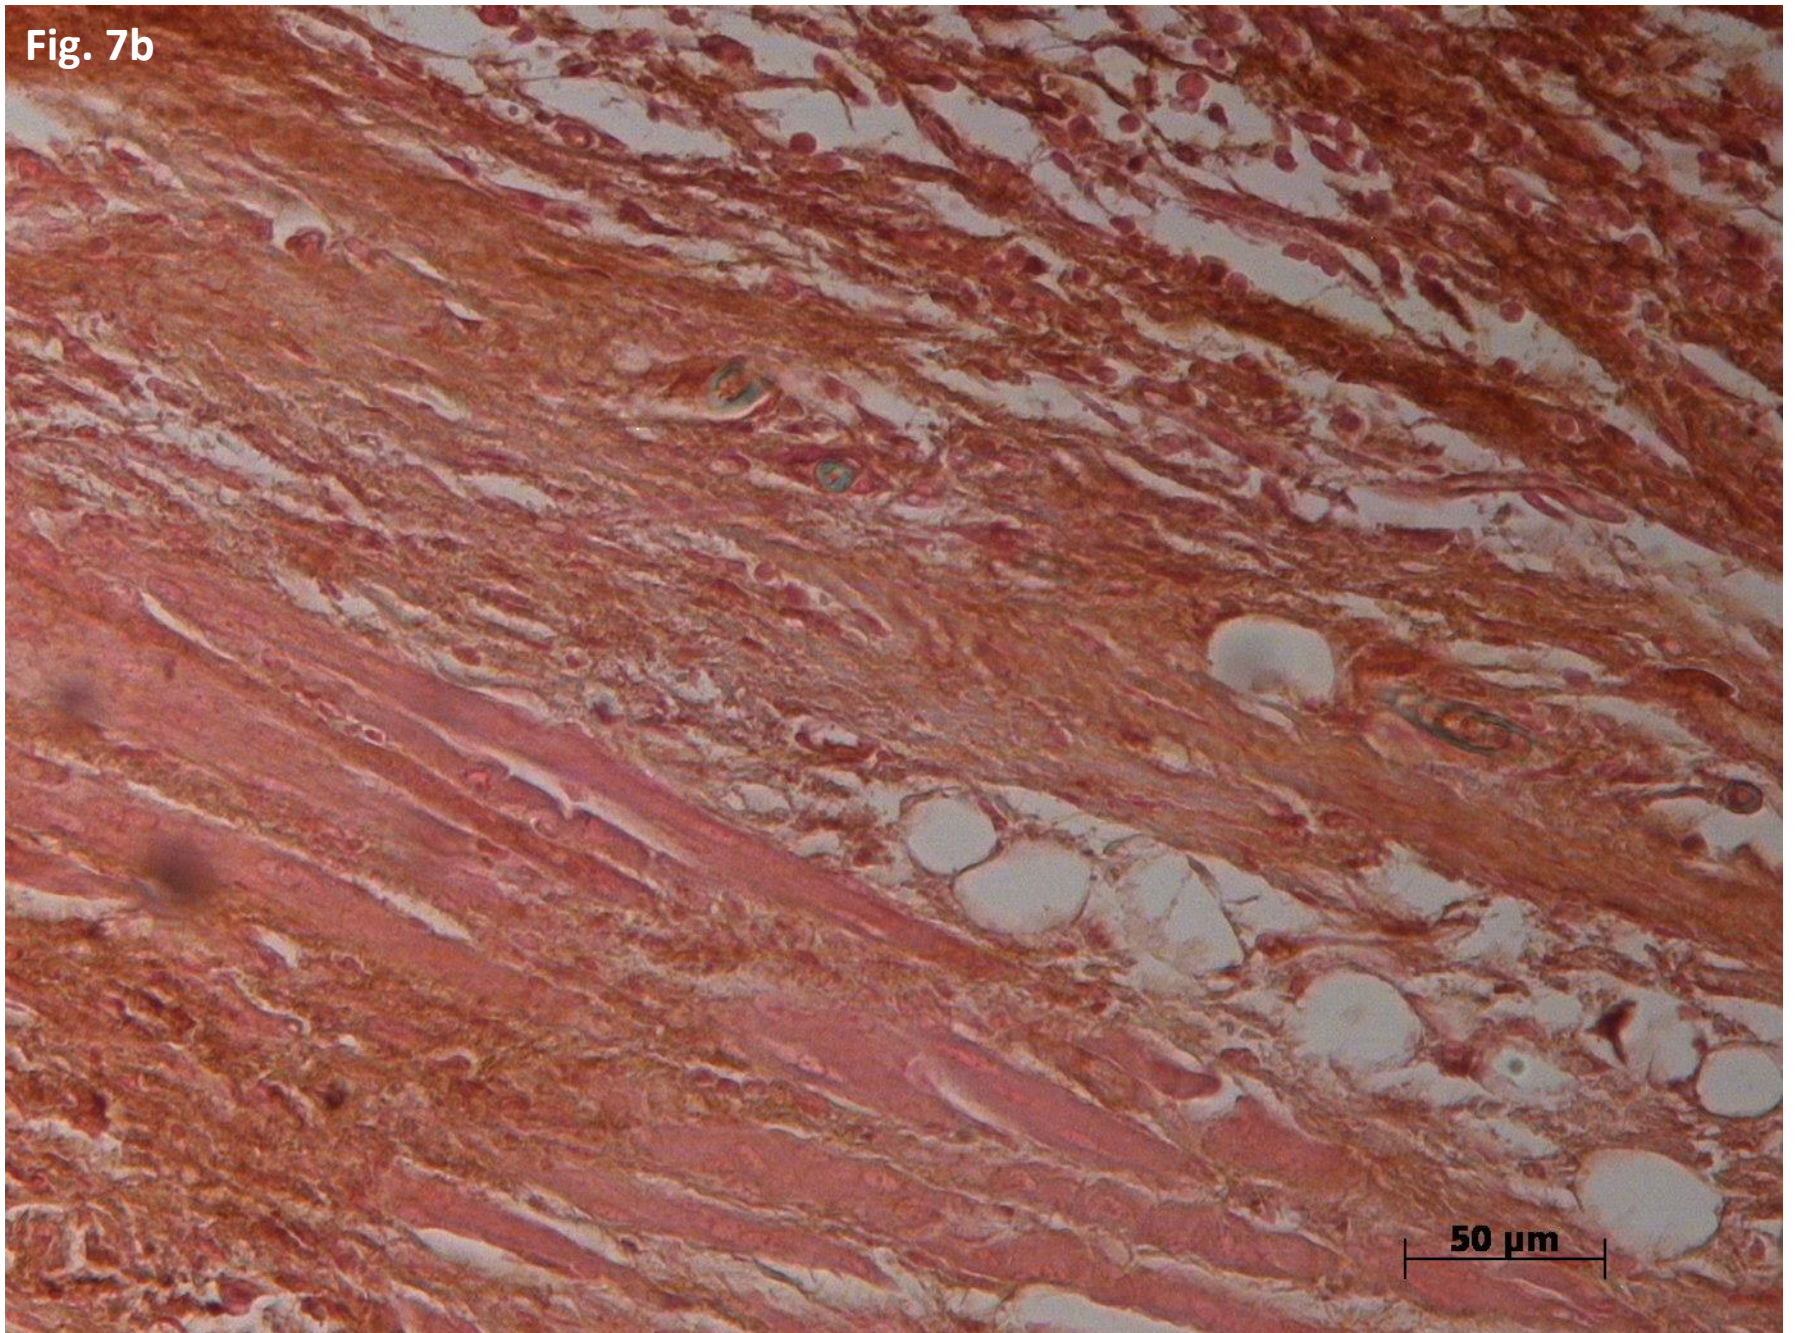



Fig. 7c

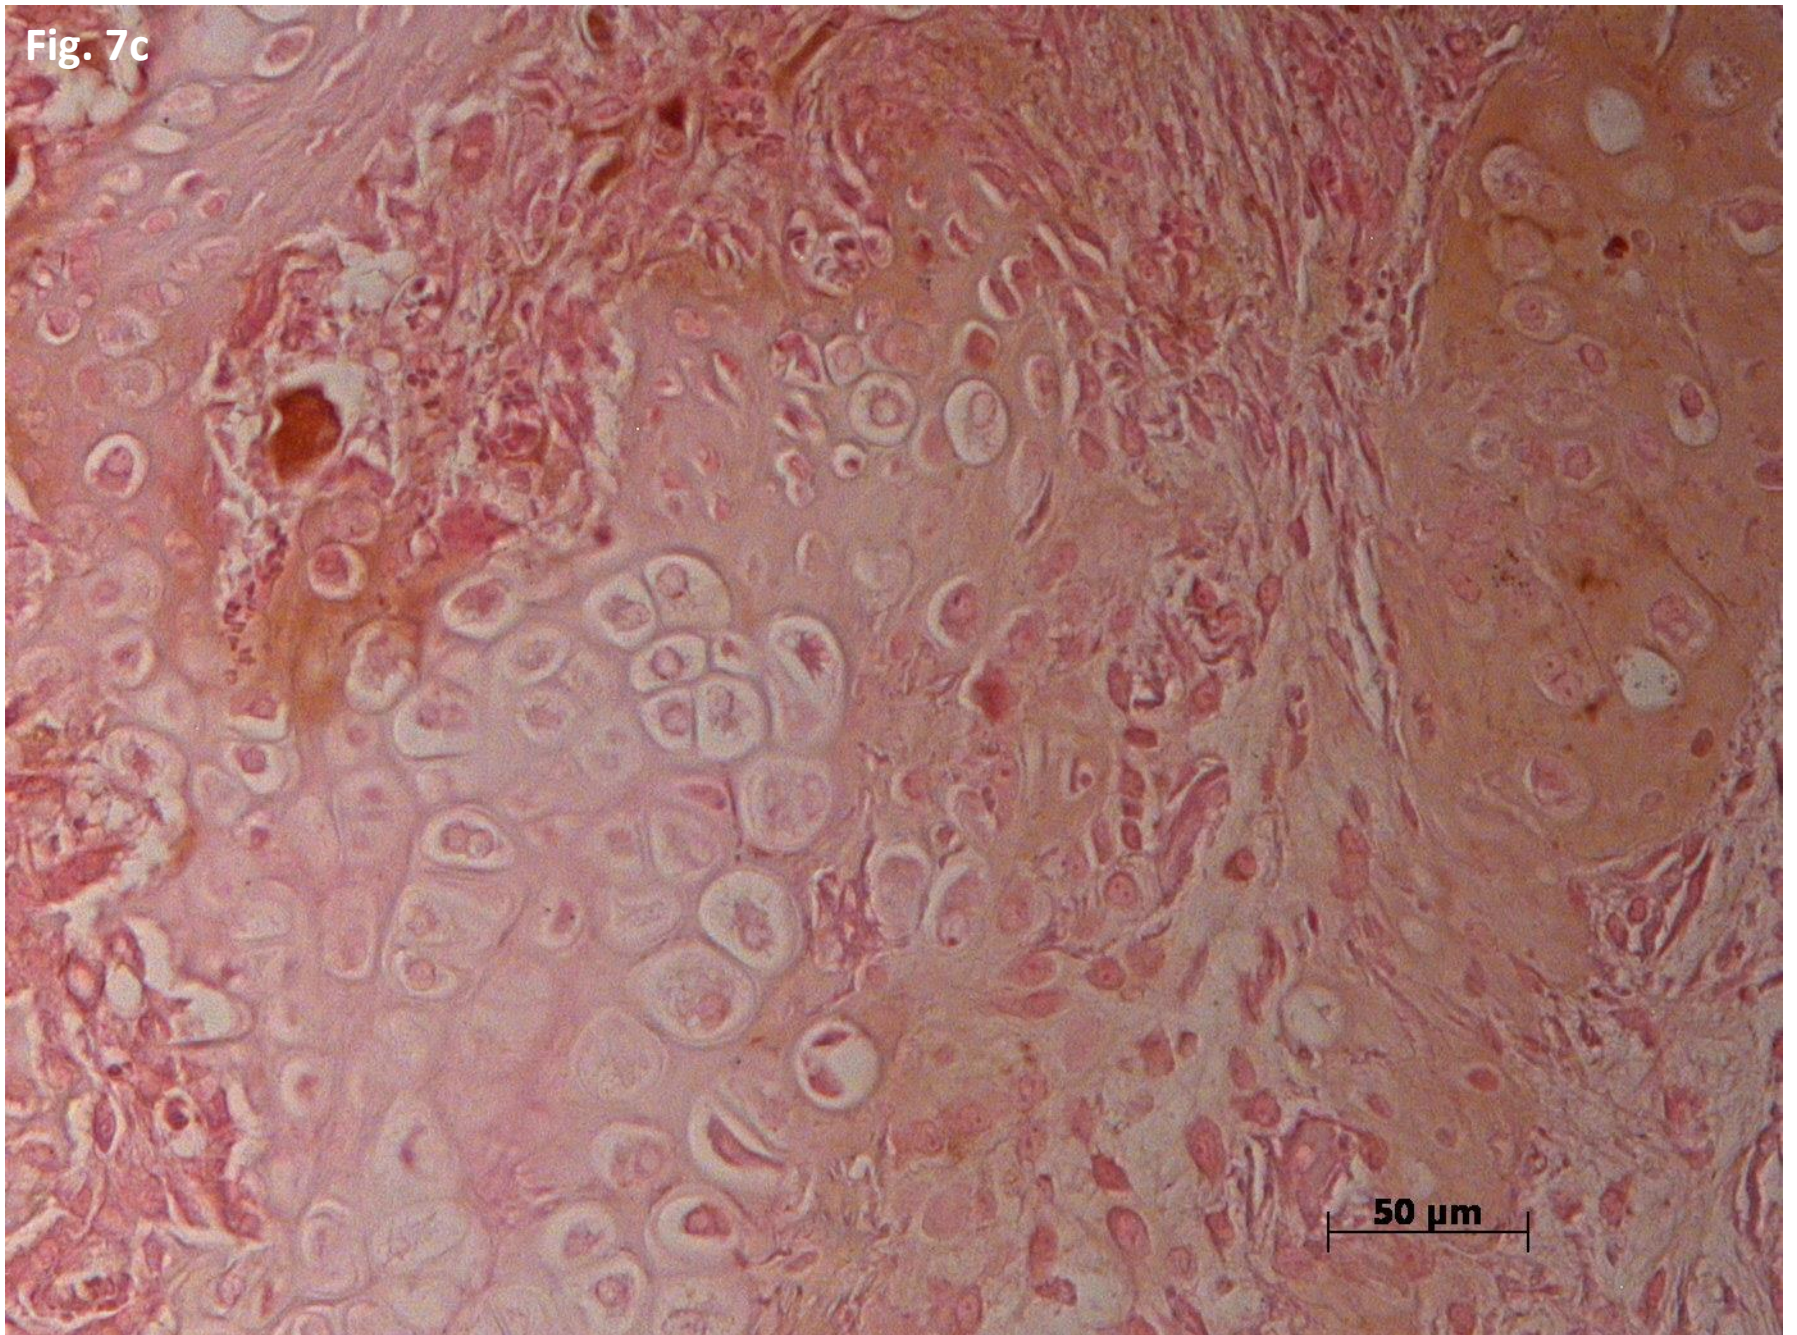



Fig. 7d

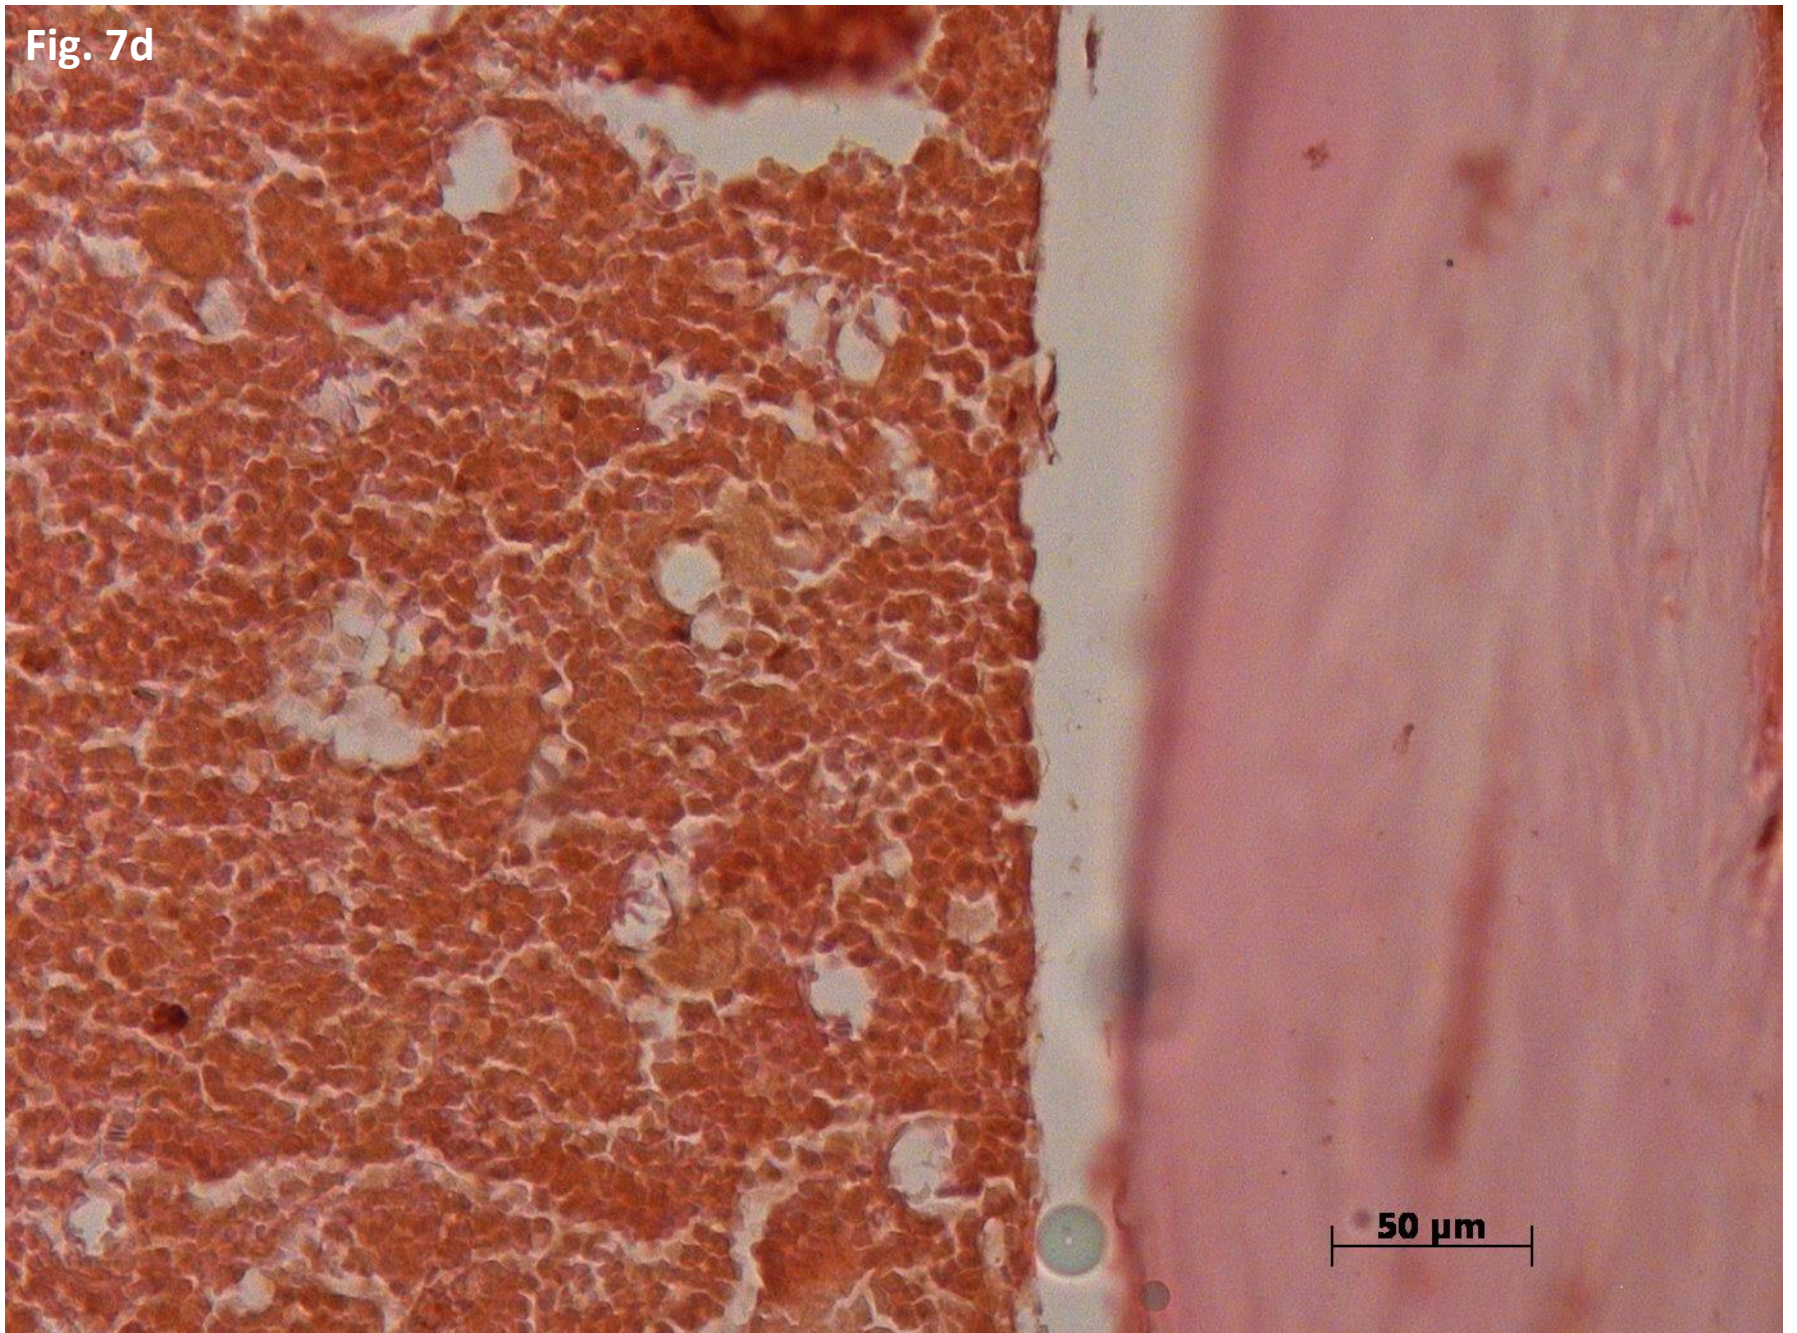



Fig. 7e

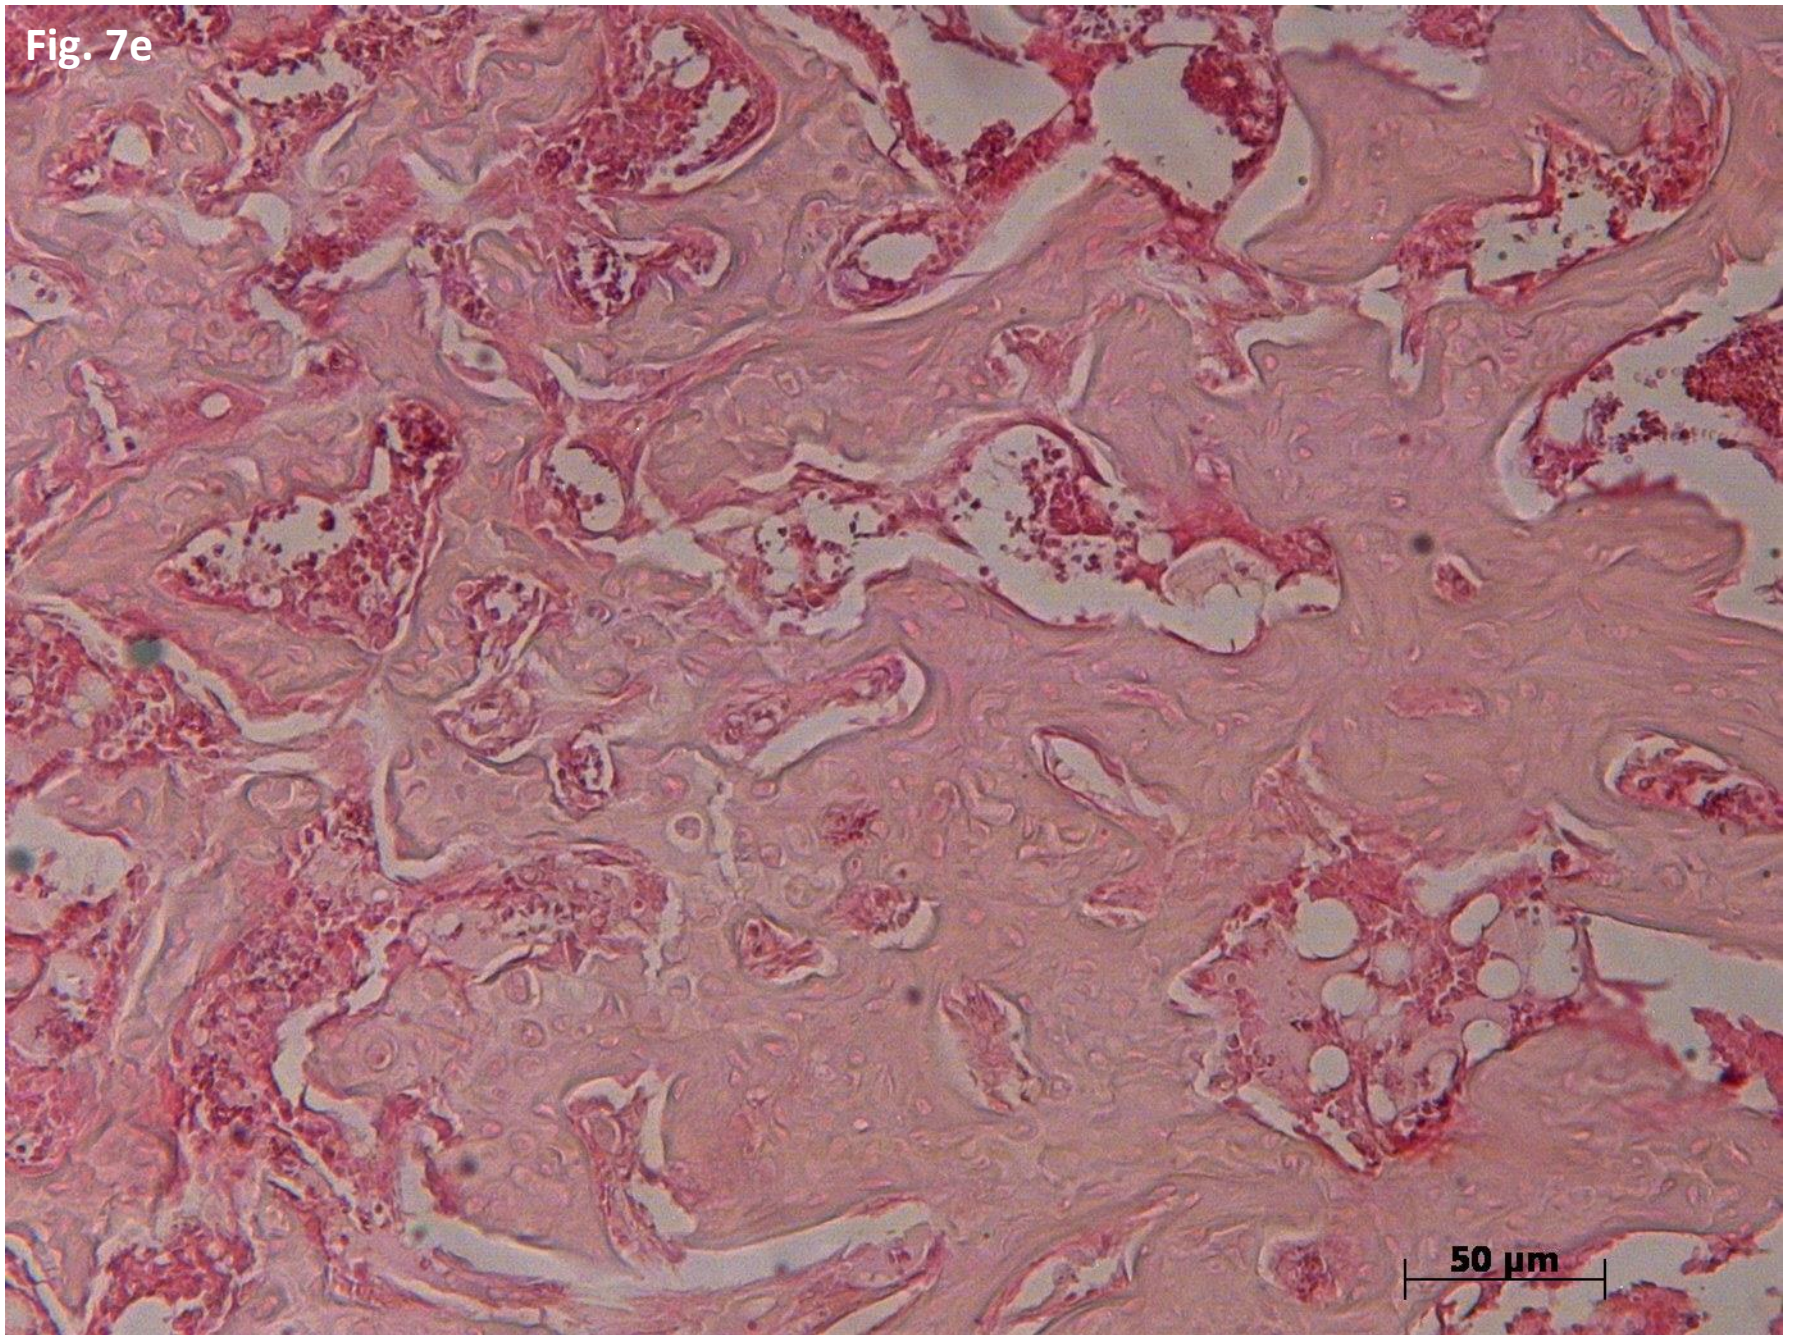



Fig. 7f

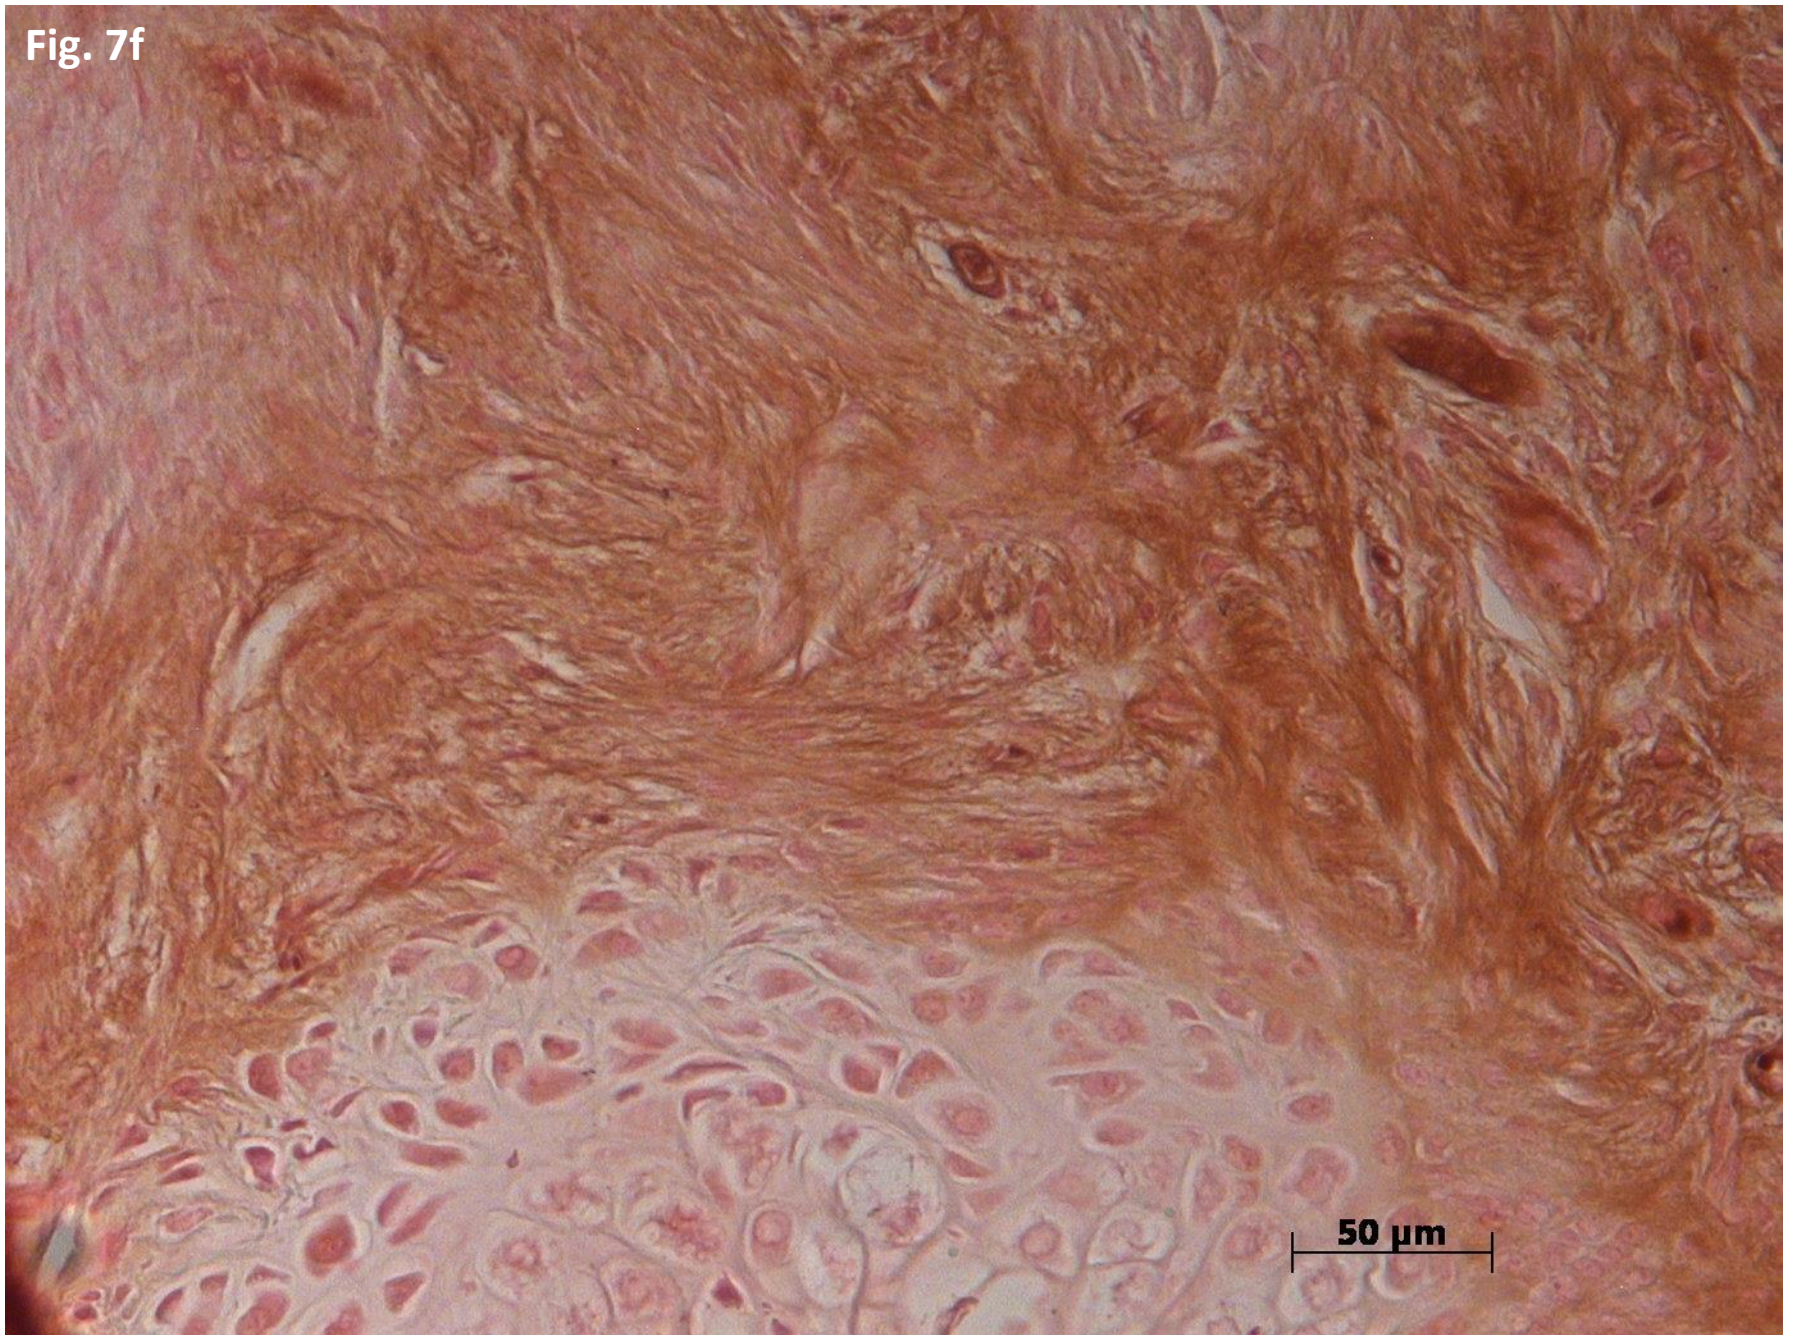

Supplement: pone.0178553.s007.pdf [file pone.0178553.s007.pdf]
